# Supplementary material for: Inorganic base catalyzed synthesis of (2-amino-3-cyano-4H-chromene-4-yl) phosphonate derivatives via multi-component reaction under mild and efficient conditions
Source: Royal Society of Chemistry journal article supplement (doi:10.1039/c4ra09359c), 2014-01-01
Supplement: c4ra09359c1.pdf [file c4ra09359c1.pdf]

*RSC Advances*

SUPPORTING INFORMATION

Supporting Information

For DOI:

This journal is © The Royal Society of Chemistry 2014

## **Supporting Information**

### **Inorganic base catalyzed synthesis of (2-amino-3-cyano-4H-chromen-4-yl) phosphonate derivatives via multi-component reaction under mild and efficient conditions**

Peng Dai, Gaofeng Zha, Xiaoyan Lai, Wei Liu, Qianwen Gan, Yongcun

Shen\*

E-mail: sycmichael@163.com.

## Contents

|                                                            |    |
|------------------------------------------------------------|----|
| General Experimental Methods.....                          | 4  |
| General Experimental Methods for Compounds 4.....          | 4  |
| General Experimental Methods for Compounds 7.....          | 4  |
| Spectroscopic Data for Compounds 4.....                    | 5  |
| Spectroscopic Data for Compounds 7.....                    | 9  |
| Copies of IR Spectra for Compounds 4.....                  | 13 |
| Copies of <sup>1</sup> H-NMR Spectra for Compounds 4.....  | 17 |
| Copies of <sup>13</sup> C-NMR Spectra for Compounds 4..... | 21 |
| Copies of <sup>31</sup> P-NMR Spectra for Compounds 4..... | 25 |
| Copies of MS Spectra for Compounds 4.....                  | 29 |
| Copies of IR Spectra for Compounds 7.....                  | 33 |
| Copies of <sup>1</sup> H-NMR Spectra for Compounds 7.....  | 37 |
| Copies of <sup>13</sup> C-NMR Spectra for Compounds 7..... | 41 |
| Copies of <sup>31</sup> P-NMR Spectra for Compounds 7..... | 45 |
| Copies of MS Spectra for Compounds 7.....                  | 49 |

### General Experimental Methods

All reactions were carried out in reaction tubes with magnetic stirring and no special precautions were taken to exclude air from the reaction vessels. NMR spectra were recorded with a Bruker Avance HD III 500NMR spectrometer. Chemical shifts are reported in parts per million (ppm) downfield from TMS with the solvent resonance as the internal standard. Coupling constants (J) are reported in Hz and refer to apparent peak multiplicity. ESI-MS was recorded on a Thermo-LTQ XL mass spectrometer. Melting points were determined on a WRS-2A(Shanghai Jingke) instrument and uncorrected, All other reagents were purchased from commercial sources and used without further purification.

### General Experimental Methods for Compounds 4a

LiOH (0.2 mmol) was added to a mixture of Salicylaldehyde (1 mmol), Malononitrile (1 mmol) and Diethyl phosphite (Triethyl phosphate) (1 mmol) in neat condition. The resulting mixture was stirred for the appropriate time at room temperature. Then the appropriate amount of ethanol (3mL) was added to reaction mixture. After completion of the reaction (monitored by TLC), distilled water (15mL) was added to the reaction mixture and stirring continued till a free flowing solid was obtained. It was filtered and then washed successively with water (5mLx3), anhydrous ether (2mLx3). The crude product was further purified by recrystallization from anhydrous ethanol solution.

### General Experimental Methods for Compounds 7a

LiOH (0.2 mmol) was added to a mixture of Salicylaldehyde (1 mmol), Malononitrile (1 mmol) and Diphenyl phosphate (1 mmol) in neat condition. The resulting mixture was stirred at room temperature for 20min. Then added 3ml of anhydrous ethanol. After completion of the reaction (monitored by TLC), the reaction mixture was evaporated under reduced pressure, then distilled water (10 mL) was added to the reaction mixture and stirring 30min. Some desired product precipitated directly and some product was purified by silica column chromatography using Ethylacetate/petroleum ether=1/2. Finally the crude product was purified by recrystallization from ethyl acetate and ethanol solution.

## Spectroscopic Data for Compounds 4

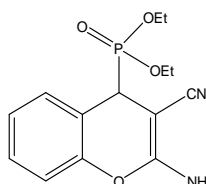**4a. diethyl 2-amino-3-cyano-4H-chromen-4-ylphosphonate**

Yield: 94%; white solid; mp 178.8-180.5 °C. IR (neat): 3311, 3166, 2986, 2189, 1646, 1419, 1228, 1013, 971  $\text{cm}^{-1}$ .  $^1\text{H-NMR}$  (500 MHz,  $\text{CDCl}_3$ ):  $\delta$ (ppm) 7.34 (t,  $J = 8.0$  Hz, 1H, Ar-H), 7.28 (d,  $J = 8.3$  Hz, 1H, Ar-H), 7.16 (d,  $J = 7.7$  Hz, 1H, Ar-H), 6.99 (d,  $J = 7.3$  Hz, 1H, Ar-H), 5.12 (s, 2H,  $-\text{NH}_2$ ), 4.06 – 3.98 (m, 4H,  $-\text{OCH}_2$ ), 3.96 (d,  $J = 17.6$  Hz, 1H, P-CH), 1.35 (t,  $J = 7.0$  Hz, 3H,  $-\text{CH}_3$ ), 1.30 (t,  $J = 7.0$  Hz, 3H,  $-\text{CH}_3$ ).  $^{13}\text{C-NMR}$  (126 MHz,  $\text{CDCl}_3$ )  $\delta$ : 162.01, 149.93, 129.58, 129.02, 124.95, 119.54, 116.51, 77.31, 77.06, 76.80, 63.32, 62.98, 51.42, 36.05, 34.87, 16.38.  $^{31}\text{P-NMR}$  (202 MHz,  $\text{CDCl}_3$ )  $\delta$ : 22.25 – 21.16. MS (ESI):  $m/z$  639.32 ( $2\text{M}+\text{Na}$ ), 635.32 ( $2\text{M}+\text{NH}_4^+$ ).

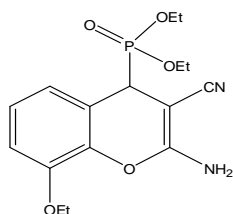**4b. diethyl 2-amino-3-cyano-8-ethoxy-4H-chromen-4-ylphosphonate**

Yield: 96%; yellow solid, mp 180.1-180.6 °C. IR (neat): 3445, 3177, 2986, 2188, 1640, 1401, 1201, 1017, 964  $\text{cm}^{-1}$ .  $^1\text{H-NMR}$  (500 MHz,  $\text{DMSO-d}_6$ ):  $\delta$ (ppm) 7.13 (s, 2H,  $-\text{NH}_2$ ), 7.06 (t,  $J = 7.9$  Hz, 1H, Ar-H), 7.00 (d,  $J = 8.3$  Hz, 1H, Ar-H), 6.81 (d,  $J = 7.7$  Hz, 1H, Ar-H), 4.10 (tt,  $J = 7.0, 3.5$  Hz, 2H,  $-\text{OCH}_2$ ), 4.05 (d,  $J = 17.6$  Hz, 1H, P-CH), 3.99 – 3.87 (m, 4H,  $-\text{OCH}_2$ ), 1.34 (dd,  $J = 8.7, 5.2$  Hz, 3H,  $-\text{CH}_3$ ), 1.20 (t,  $J = 7.0$  Hz, 3H,  $-\text{CH}_3$ ), 1.15 (t,  $J = 7.0$  Hz, 3H,  $-\text{CH}_3$ ).  $^{13}\text{C-NMR}$  (126 MHz,  $\text{DMSO-d}_6$ )  $\delta$ : 163.08, 146.77, 140.16, 124.50, 121.25, 120.55, 119.26, 113.59, 64.78, 62.69, 47.95, 40.00, 39.83, 39.66, 39.50, 35.88, 34.72, 16.67, 15.07.  $^{31}\text{P-NMR}$  (202 MHz,  $\text{DMSO-d}_6$ )  $\delta$ : 23.00–21.99. MS (ESI):  $m/z$  375.45 ( $\text{M}+\text{Na}$ ).

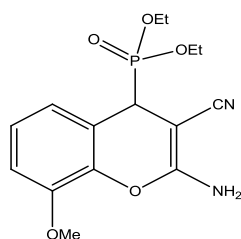

**4c. diethyl 2-amino-3-cyano-8-methoxy-4H-chromen-4-ylphosphonate**

Yield: 96%; yellow solid; mp 184.5-184.8 °C. IR (neat): 3421, 3170, 2982, 2188, 1641, 1408, 1261, 1018, 965  $\text{cm}^{-1}$ .  $^1\text{H-NMR}$  (500 MHz,  $\text{DMSO-d}_6$ ):  $\delta$ (ppm) 7.17 (d,  $J = 16.6$  Hz, 2H,  $-\text{NH}_2$ ), 7.09 (t,  $J = 8.0$  Hz, 1H, Ar-H), 7.01 (d,  $J = 8.3$  Hz, 1H, Ar-H), 6.82 (d,  $J = 7.7$  Hz, 1H, Ar-H), 4.05 (d,  $J = 17.6$  Hz, 1H, P-CH), 3.99 – 3.88 (m, 4H,  $-\text{OCH}_2$ ), 3.82 (s, 3H,  $-\text{OCH}_3$ ), 1.20 (t,  $J = 7.0$  Hz, 3H,  $-\text{CH}_3$ ), 1.15 (t,  $J = 7.0$  Hz, 3H,  $-\text{CH}_3$ ).  $^{13}\text{C-NMR}$  (126 MHz,  $\text{DMSO-d}_6$ )  $\delta$ : 163.10, 147.62, 139.81, 124.48, 121.15, 120.52, 119.15, 112.14, 79.67, 79.41, 79.15, 62.70, 56.52, 56.20, 47.88, 40.01, 39.84, 39.67, 39.50, 35.87, 34.72, 18.98, 16.67.  $^{31}\text{P-NMR}$  (202 MHz,  $\text{DMSO}$ )  $\delta$ : 23.01 – 21.99. MS (ESI):  $m/z$  361.76 ( $\text{M}+\text{Na}$ ).

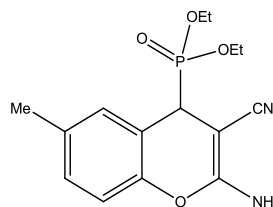

**4d. diethyl 2-amino-3-cyano-6-methyl-4H-chromen-4-ylphosphonate**

Yield: 97%; yellow solid; mp 177.4-179.6 °C. IR (neat): 3353, 3164, 2984, 2185, 1648, 1418, 1230, 1016, 968  $\text{cm}^{-1}$ .  $^1\text{H-NMR}$  (500 MHz,  $\text{DMSO-d}_6$ ):  $\delta$ (ppm) 7.10 (s, 2H,  $-\text{NH}_2$ ), 7.10 – 7.08 (m, 1H, Ar-H), 7.06 (s, 1H, Ar-H), 6.91 (d,  $J = 8.2$  Hz, 1H, Ar-H), 4.03 (d,  $J = 17.6$  Hz, 1H, P-CH), 3.99 – 3.88 (m, 4H,  $-\text{OCH}_2$ ), 2.27 (s, 3H,  $-\text{CH}_3$ ), 1.20 (t,  $J = 7.0$  Hz, 3H,  $-\text{CH}_3$ ), 1.15 (t,  $J = 7.0$  Hz, 3H,  $-\text{CH}_3$ ).  $^{13}\text{C-NMR}$  (126 MHz,  $\text{DMSO-d}_6$ )  $\delta$ : 163.22, 148.40, 133.69, 130.14, 129.63, 120.65, 117.82, 116.12, 62.67, 47.84, 40.48, 39.98, 39.82, 39.68, 39.57, 35.60, 34.44, 20.72, 16.66.  $^{31}\text{P-NMR}$  (202 MHz,  $\text{DMSO-d}_6$ )  $\delta$ : 23.03 – 22.08. MS (ESI):  $m/z$  345.68 ( $\text{M} + \text{Na}$ ).

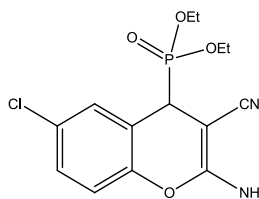

**4e. diethyl 2-amino-6-chloro-3-cyano-4H-chromen-4-ylphosphonate**

Yield: 90%; pink solid; mp 175.7-177.6°C. IR (neat): 3354, 3152, 2988, 2188, 1655, 1418, 1242, 1041, 969  $\text{cm}^{-1}$ .  $^1\text{H-NMR}$  (500 MHz,  $\text{DMSO-d}_6$ ):  $\delta$ (ppm) 7.37 (dt,  $J = 8.7, 2.3$  Hz, 1H, Ar-H), 7.31 (t,  $J = 2.3$  Hz, 1H, Ar-H), 7.26 (s, 2H,  $-\text{NH}_2$ ), 7.06 (d,  $J = 8.7$  Hz, 1H, Ar-H), 4.20 (d,  $J = 18.3$  Hz, 1H, P-CH), 3.97 (dddd,  $J = 12.2, 8.3, 5.8, 2.2$  Hz, 4H,  $-\text{OCH}_2$ ), 1.21 (t,  $J = 7.0$  Hz, 3H,  $-\text{CH}_3$ ), 1.15 (t,  $J = 7.0$  Hz, 3H,  $-\text{CH}_3$ ).  $^{13}\text{C-NMR}$  (126 MHz,  $\text{DMSO-d}_6$ )  $\delta$ : 162.87, 149.26, 129.47, 129.05, 128.27, 120.53, 120.24, 118.24, 62.86, 47.61, 40.42, 40.00, 39.83, 39.67, 39.50, 35.39, 34.23, 16.63.  $^{31}\text{P-NMR}$  (202 MHz,  $\text{DMSO}$ )  $\delta$ : 22.39–21.37. MS (ESI):  $m/z$  365.86 (M+Na).

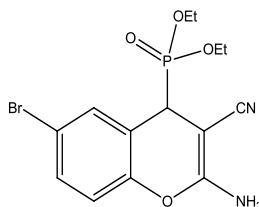

**4f. diethyl 2-amino-6-bromo-3-cyano-4H-chromen-4-ylphosphonate**

Yield: 91%; white solid; mp 178.1-179.2°C. IR (neat): 3353, 3155, 2986, 2189, 1654, 1416, 1238, 1043, 969  $\text{cm}^{-1}$ .  $^1\text{H-NMR}$  (500 MHz,  $\text{DMSO-d}_6$ ):  $\delta$ (ppm) 7.48 (d,  $J = 8.7$  Hz, 1H, Ar-H), 7.44 (t,  $J = 2.2$  Hz, 1H, Ar-H), 7.24 (s, 2H,  $-\text{NH}_2$ ), 7.01 (d,  $J = 8.7$  Hz, 1H, Ar-H), 4.20 (d,  $J = 18.3$  Hz, 1H, P-CH), 4.07 – 3.86 (m, 4H,  $-\text{OCH}_2$ ), 1.21 (t,  $J = 7.0$  Hz, 3H,  $-\text{CH}_3$ ), 1.16 (t,  $J = 7.0$  Hz, 3H,  $-\text{CH}_3$ ).  $^{13}\text{C-NMR}$  (126 MHz,  $\text{DMSO-d}_6$ )  $\delta$ : 162.83, 149.73, 132.37, 131.92, 120.94, 120.23, 118.62, 116.13, 62.86, 39.99, 39.83, 39.66, 39.49, 35.25, 34.10, 16.63.  $^{31}\text{P-NMR}$  (202 MHz,  $\text{DMSO-d}_6$ )  $\delta$ : 22.41–21.39. MS (ESI):  $m/z$  411.80 (M+Na).

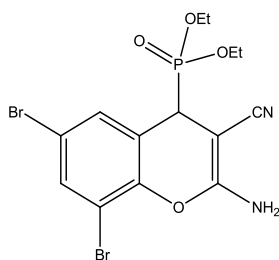

**4g. diethyl 2-amino-6,8-dibromo-3-cyano-4H-chromen-4-yl**

**phosphonate**

Yield: 89%; white solid; mp 183.2-185.1 °C. IR (neat): 3354, 3155, 2985, 2197, 1662, 1414, 1238, 1045, 967  $\text{cm}^{-1}$ .  $^1\text{H-NMR}$  (500 MHz,  $\text{DMSO-d}_6$ ):  $\delta$ (ppm) 7.87 (t,  $J = 2.1$  Hz, 1H, Ar-H), 7.45 (t,  $J = 2.1$  Hz, 1H, Ar-H), 7.40 (s, 2H,  $-\text{NH}_2$ ), 4.28 (d,  $J = 18.5$  Hz, 1H, P-CH), 4.06 – 3.88 (m, 4H,  $-\text{OCH}_2$ ), 1.20 (t,  $J = 7.0$  Hz, 3H,  $-\text{CH}_3$ ), 1.16 (t,  $J = 7.0$  Hz, 3H,  $-\text{CH}_3$ ).  $^{13}\text{C-NMR}$  (126 MHz,  $\text{DMSO-d}_6$ )  $\delta$ : 162.50, 146.88, 134.43, 131.86, 122.52, 119.77, 116.32, 110.98, 63.02, 48.03, 40.00, 39.83, 39.67, 39.50, 35.73, 34.58, 16.60.  $^{31}\text{P-NMR}$  (202 MHz,  $\text{DMSO-d}_6$ )  $\delta$ : 22.01– 21.07. MS (ESI):  $m/z$  489.63 (M+Na).

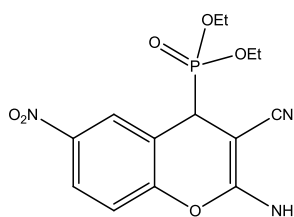

**4h. diethyl 2-amino-3-cyano-6-nitro-4H-chromen-4-yl**

**phosphonate**

Yield: 86%; yellow solid, mp 182.5-183.8 °C. IR (neat): 3340, 3151, 2986, 2192, 1658, 1417, 1237, 1033, 972  $\text{cm}^{-1}$ .  $^{13}\text{C-NMR}$  (126 MHz,  $\text{DMSO-d}_6$ )  $\delta$ : 162.21, 154.85, 143.89, 125.74, 125.15, 120.06, 119.83, 117.85, 63.04, 47.67, 39.99, 39.83, 39.66, 39.49, 35.16, 34.01, 16.60.  $^{31}\text{P-NMR}$  (202 MHz,  $\text{DMSO-d}_6$ )  $\delta$ : 21.97– 20.95. MS (ESI):  $m/z$  376.59 (M+Na).



## Spectroscopic Data for Compounds 7

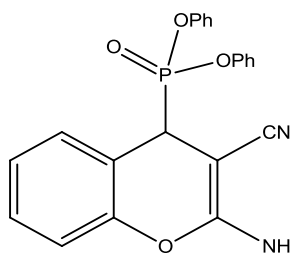**7a. diphenyl 2-amino-3-cyano-4H-chromen-4-ylphosphonate**

Yield: 91%; white solid; mp 179.1-180.2°C. IR (neat): 3385, 3308, 3187, 2182, 1655, 1585, 1488, 1267, 1052, 929  $\text{cm}^{-1}$ .  $^1\text{H-NMR}$  (500 MHz,  $\text{DMSO-d}_6$ ):  $\delta$  (ppm) 7.45 (s, 2H,  $-\text{NH}_2$ ), 7.45 – 6.63 (m, 14H, Ar-H), 4.77 (d,  $J = 16.8$  Hz, 1H, P-CH).  $^{13}\text{C-NMR}$  (126 MHz,  $\text{DMSO-d}_6$ )  $\delta$ : 163.62, 150.59, 130.33, 129.92, 125.62, 125.14, 120.70, 120.44, 117.00, 116.71, 47.05, 40.00, 39.84, 39.67, 39.58, 36.71, 35.53.  $^{31}\text{P-NMR}$  (202 MHz,  $\text{DMSO-d}_6$ )  $\delta$ : 16.05. MS (ESI):  $m/z$  427.70 (M+Na).

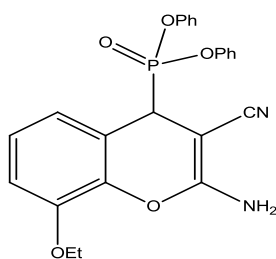**7b. diphenyl 2-amino-3-cyano-8-ethoxy-4H-chromen-4-yl****phosphonate**

Yield: 92%; yellow solid; mp 178.8-179.7°C. IR (neat): 3385, 3308, 3196, 2189, 1643, 1583, 1484, 1267, 1076, 933  $\text{cm}^{-1}$ .  $^1\text{H-NMR}$  (500 MHz,  $\text{DMSO-d}_6$ ):  $\delta$  (ppm) 7.39 (s, 2H,  $-\text{NH}_2$ ), 7.37 – 6.87 (m, 13H, Ar-H), 4.71 (d,  $J = 16.9$  Hz, 1H, P-CH), 4.12 (q,  $J = 7.0$  Hz, 2H,  $-\text{OCH}_2$ ), 1.34 (t,  $J = 7.0$  Hz, 3H,  $-\text{CH}_3$ ).  $^{13}\text{C-NMR}$  (126 MHz,  $\text{DMSO-d}_6$ )  $\delta$ : 163.59, 150.62, 146.94, 140.31, 130.27, 125.59, 124.94, 121.51, 120.72, 120.46, 117.98, 114.18, 64.85, 47.04, 40.00, 39.83, 39.58, 36.95, 35.78, 15.04.  $^{31}\text{P-NMR}$  (202 MHz,  $\text{DMSO-d}_6$ )  $\delta$ : 16.06. MS (ESI):  $m/z$  467.04 (M+ $\text{NH}_4^+$ ), 471.93(M+Na).

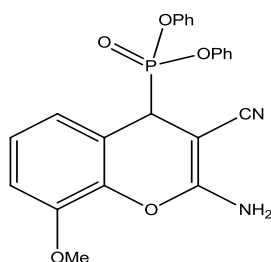

**7c. diphenyl 2-amino-3-cyano-8-methoxy-4H-chromen-4-yl**

**phosphonate**

Yield: 92%; yellow solid; mp 177.5-178.7°C. IR (neat): 3441, 3318, 3198, 2189, 1646, 1583, 1486, 1272, 1080, 935  $\text{cm}^{-1}$ .  $^1\text{H-NMR}$  (500 MHz,  $\text{DMSO-d}_6$ ):  $\delta$  (ppm) 7.44 (s, 2H,  $-\text{NH}_2$ ), 7.38 – 6.92 (m, 13H, Ar-H), 4.72 (d,  $J = 16.9$  Hz, 1H, P-CH), 3.83 (s, 3H,  $-\text{OCH}_3$ ).  $^{13}\text{C-NMR}$  (126 MHz,  $\text{DMSO-d}_6$ )  $\delta$ : 163.61, 150.61, 147.78, 139.96, 130.28, 125.60, 124.97, 121.42, 120.73, 120.47, 117.91, 112.79, 56.28, 46.92, 39.99, 39.82, 39.66, 39.49, 36.88, 35.70.  $^{31}\text{P-NMR}$  (202 MHz,  $\text{DMSO-d}_6$ )  $\delta$ : 16.04. MS (ESI):  $m/z$  457.58 (M+Na).

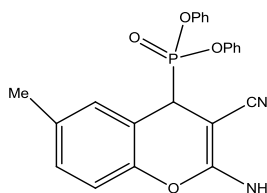

**7d. diphenyl 2-amino-3-cyano-6-methyl-4H-chromen-4-yl**

**phosphonate**

Yield: 93%; white solid; mp 188.6-188.9°C. IR (neat): 3361, 3302, 3186, 2187, 1647, 1588, 1490, 1199, 1060, 933  $\text{cm}^{-1}$ .  $^1\text{H-NMR}$  (500 MHz,  $\text{DMSO-d}_6$ ):  $\delta$  (ppm) 7.38 (d,  $J = 3.3$  Hz, 2H,  $-\text{NH}_2$ ), 7.38 – 6.89 (m, 13H, Ar-H), 4.69 (d,  $J = 16.8$  Hz, 1H, P-CH), 2.27 (s, 3H,  $-\text{CH}_3$ ).  $^{13}\text{C-NMR}$  (126 MHz,  $\text{DMSO-d}_6$ )  $\delta$ : 163.77, 150.65, 148.58, 134.16, 130.34, 125.59, 123.20 – 118.88, 117.24 – 113.96, 46.98, 39.84, 39.67, 39.50, 38.14, 36.16, 35.53 – 31.88, 20.72.  $^{31}\text{P-NMR}$  (202 MHz,  $\text{DMSO-d}_6$ )  $\delta$ : 16.07. MS (ESI):  $m/z$  441.58 (M+Na).

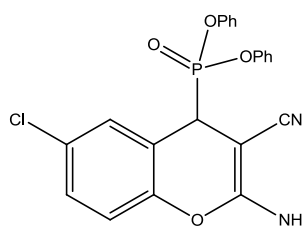

**7e. diphenyl 2-amino-6-chloro-3-cyano-4H-chromen-4-yl**

**phosphonate**

Yield: 90%; white solid; mp 181.1-181.5°C. IR (neat)  $\nu$ : 3352 3302 3181 2189 1648 1590 1485 1258 1053 937  $\text{cm}^{-1}$ .  $^1\text{H-NMR}$  (500 MHz,  $\text{DMSO-d}_6$ ):  $\delta$  (ppm) 7.50 (s,  $J = 2.1$  Hz, 2H, -NH<sub>2</sub>), 7.50 – 6.81 (m, 13H, Ar-H), 4.84 (d,  $J = 17.7$  Hz, 1H, P-CH).  $^{13}\text{C-NMR}$  (126 MHz,  $\text{DMSO-d}_6$ )  $\delta$ : 163.41, 150.50, 149.42, 130.39, 129.73, 128.66, 125.76, 120.60, 120.17, 119.21, 118.62, 46.66, 40.46, 39.96, 39.79, 39.65, 39.54, 36.48, 35.31.  $^{31}\text{P-NMR}$  (202 MHz,  $\text{DMSO-d}_6$ )  $\delta$ : 15.38. MS (ESI):  $m/z$  462.06 (M+Na).

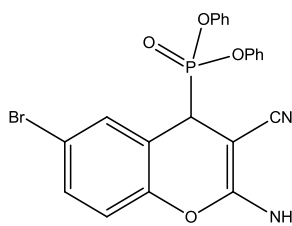

**7f. diphenyl 2-amino-6-bromo-3-cyano-4H-chromen-4-yl**

**phosphonate**

Yield: 89%; white solid; mp 175.5-176.1°C. IR (neat): 3346, 3300, 3182, 2190, 1646, 1601, 1485, 1260, 1191, 937  $\text{cm}^{-1}$ .  $^1\text{H-NMR}$  (500 MHz,  $\text{DMSO-d}_6$ ):  $\delta$  (ppm) 7.59 (ddd,  $J = 8.7, 5.5, 2.3$  Hz, 2H, Ar-H), 7.53 (s, 2H, -NH<sub>2</sub>), 7.47 – 6.85 (m, 11H, Ar-H), 4.85 (d,  $J = 17.7$  Hz, 1H, P-CH).  $^{13}\text{C-NMR}$  (126 MHz,  $\text{DMSO-d}_6$ )  $\delta$ : 163.37, 154.48 – 145.91, 132.65, 130.39, 125.75, 120.60, 120.16, 118.97, 116.50, 46.68, 39.99, 39.82, 39.66, 39.49, 36.36, 35.16 – 31.88.  $^{31}\text{P-NMR}$  (202 MHz,  $\text{DMSO-d}_6$ )  $\delta$ : 15.42. MS (ESI):  $m/z$  507.49 (M+Na).

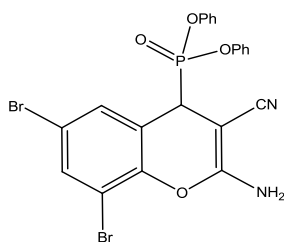

**7g. diphenyl 2-amino-6,8-dibromo-3-cyano-4H-chromen-4-**

**ylphosphonate**

Yield: 85%; yellow solid; mp 175.3-176.5 °C. IR (neat): 3439, 3337, 3072, 2194, 1735, 1648, 1419, 1244, 1034, 937  $\text{cm}^{-1}$ .  $^1\text{H-NMR}$  (500 MHz,  $\text{DMSO-d}_6$ ):  $\delta$  (ppm) 7.94 (t,  $J = 2.2$  Hz, 1H, Ar-H), 7.67 (s, 2H,  $-\text{NH}_2$ ), 7.65 – 6.95 (m, 11H, Ar-H), 4.92 (d,  $J = 18.1$  Hz, 1H, P-CH).  $^{13}\text{C-NMR}$  (126 MHz,  $\text{DMSO-d}_6$ )  $\delta$ : 163.40, 146.73, 135.91, 131.47, 130.43, 122.18, 119.17, 117.06, 113.14, 111.33, 49.30, 39.98, 39.81, 39.65, 39.48, 37.54, 32.75.  $^{31}\text{P-NMR}$  (202 MHz,  $\text{DMSO-d}_6$ )  $\delta$ : 14.90. MS (ESI):  $m/z$  585.62 ( $\text{M}+\text{Na}$ ).

## Copies of IR Spectra for Compounds 4

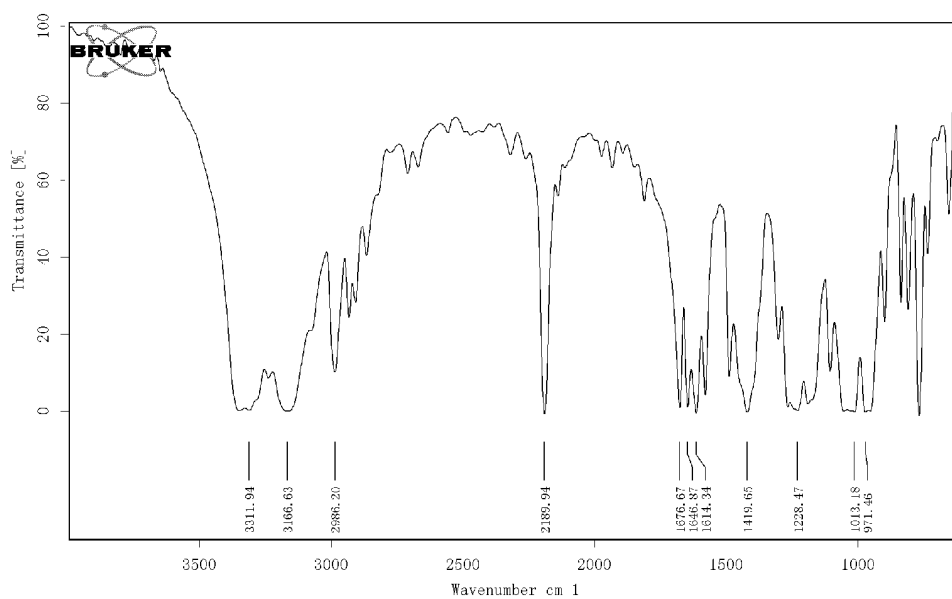

|                                             |                    |                                    |          |
|---------------------------------------------|--------------------|------------------------------------|----------|
| C:\OPUS 7.0.129\WFAS\Sample description.238 | Sample description | Instrument type and / or accessory | 2014-3-5 |
|---------------------------------------------|--------------------|------------------------------------|----------|

Page 1 of 1

## 4a.diethyl 2-amino-3-cyano-4H-chromen-4-ylphosphonate

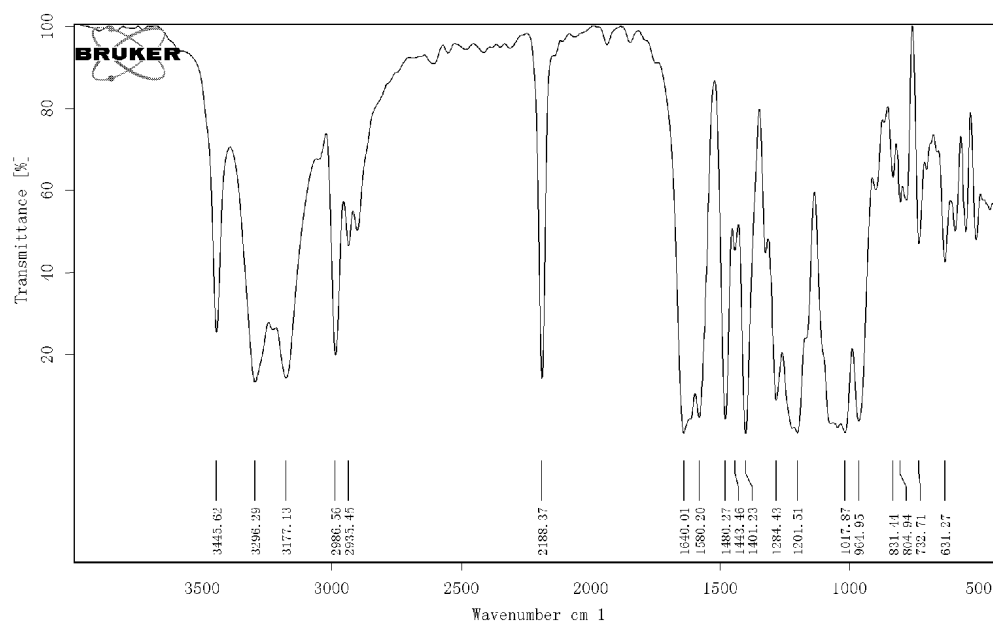

|                                             |                    |                                    |          |
|---------------------------------------------|--------------------|------------------------------------|----------|
| C:\OPUS 7.0.129\WFAS\Sample description.646 | Sample description | Instrument type and / or accessory | 2014-5-6 |
|---------------------------------------------|--------------------|------------------------------------|----------|

Page 1 of 1

## 4b.diethyl 2-amino-3-cyano-8-ethoxy-4H-chromen-4-ylphosphonate

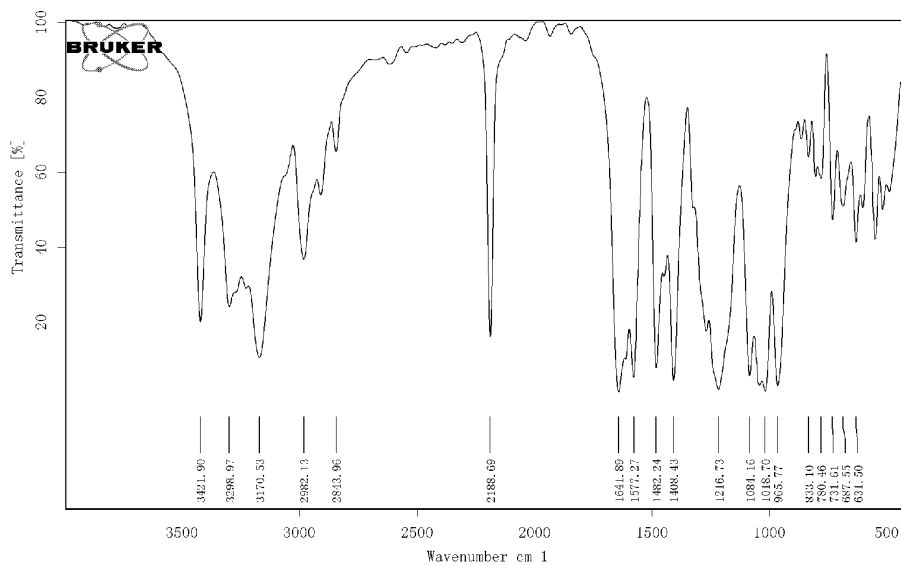

|                                             |                    |                                    |          |
|---------------------------------------------|--------------------|------------------------------------|----------|
| C:\OPUS 7.0.129\WFAS\Sample description.647 | Sample description | Instrument type and / or accessory | 2014-5-6 |
|---------------------------------------------|--------------------|------------------------------------|----------|

Page 1 of 1

**4c. diethyl 2-amino-3-cyano-8-methoxy-4H-chromen-4-ylphosphonate**

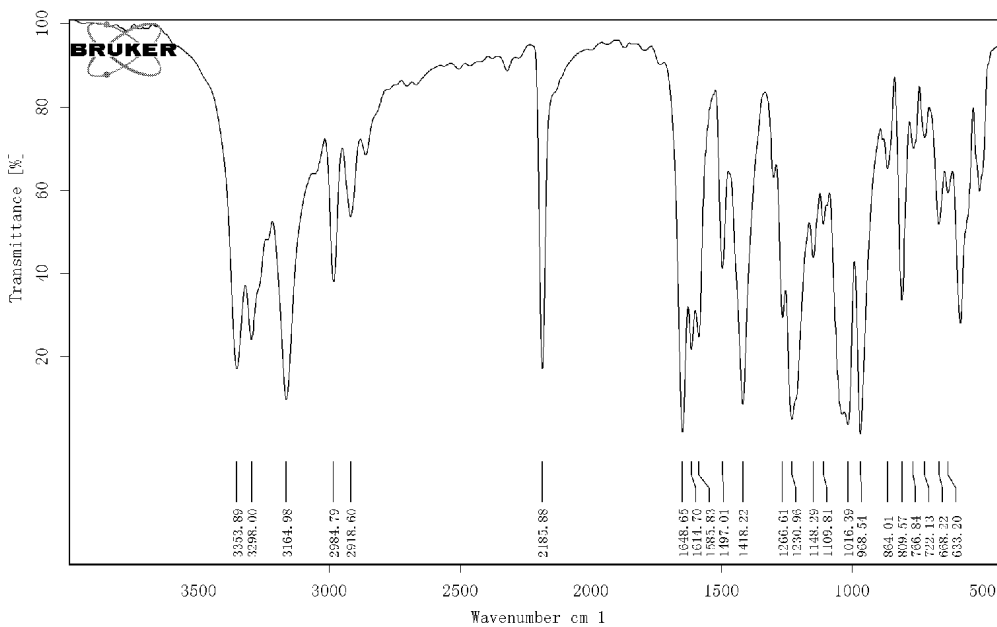

|                                             |                    |                                    |          |
|---------------------------------------------|--------------------|------------------------------------|----------|
| C:\OPUS 7.0.129\WFAS\Sample description.645 | Sample description | Instrument type and / or accessory | 2014-3-6 |
|---------------------------------------------|--------------------|------------------------------------|----------|

Page 1 of 1

**4d. diethyl 2-amino-3-cyano-6-methyl-4H-chromen-4-ylphosphonate**

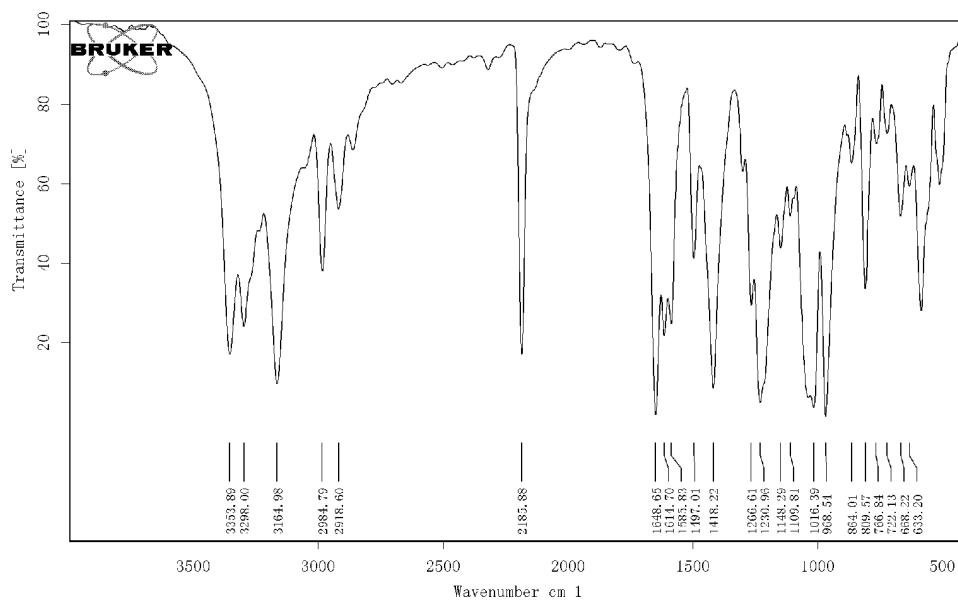

|                                              |                    |                                    |          |
|----------------------------------------------|--------------------|------------------------------------|----------|
| C:\VOPUS 7.0.129\MEAS\Sample description.645 | Sample description | Instrument type and / or accessory | 2014-5-6 |
|----------------------------------------------|--------------------|------------------------------------|----------|

Page 1 of 1

**4e. diethyl 2-amino-6-chloro-3-cyano-4H-chromen-4-ylphosphonate**

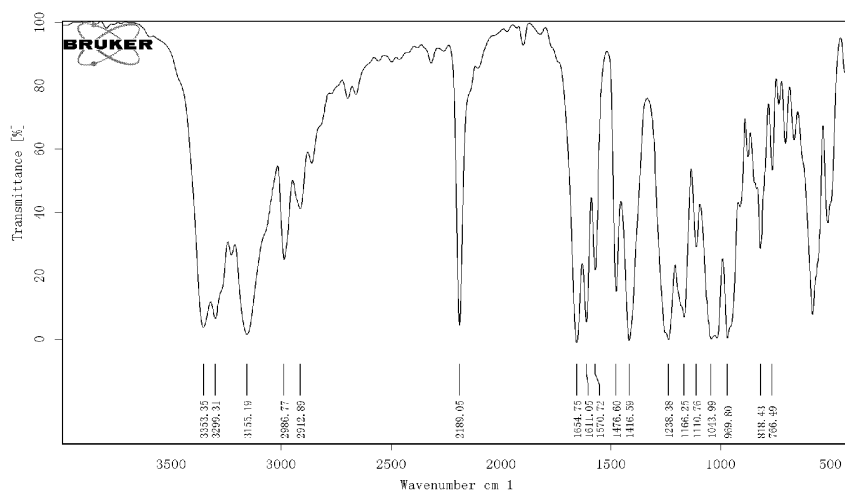

|                                              |                    |                                    |          |
|----------------------------------------------|--------------------|------------------------------------|----------|
| C:\VOPUS 7.0.129\MEAS\Sample description.648 | Sample description | Instrument type and / or accessory | 2014-5-6 |
|----------------------------------------------|--------------------|------------------------------------|----------|

Page 1 of 1

**4f. diethyl 2-amino-6-bromo-3-cyano-4H-chromen-4-ylphosphonate**

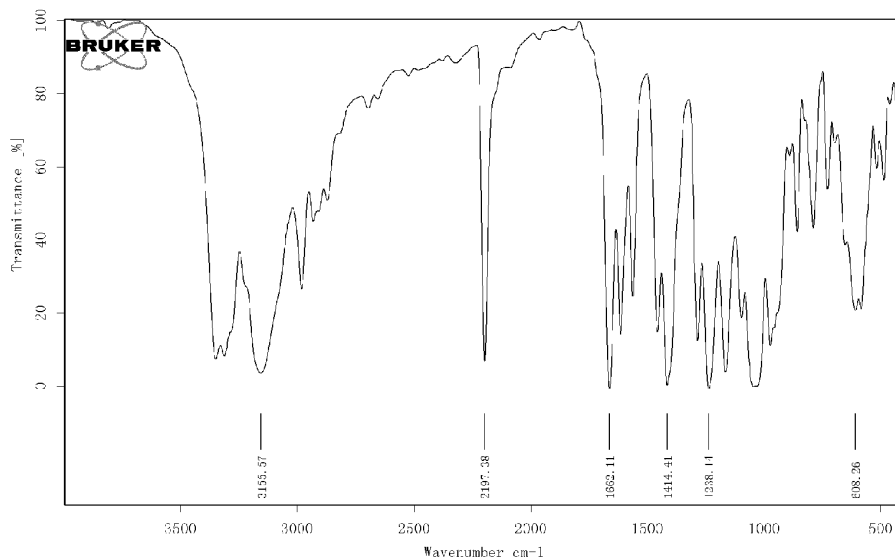

|                                             |                    |                                    |          |
|---------------------------------------------|--------------------|------------------------------------|----------|
| C:\OPUS 7.0.129\MEAS\Sample description.643 | Sample description | Instrument type and / or accessory | 2014 5 6 |
|---------------------------------------------|--------------------|------------------------------------|----------|

Page 1 of 1

**4g. diethyl 2-amino-6, 8-dibromo-3-cyano-4H-chromen-4-ylphosphonate**

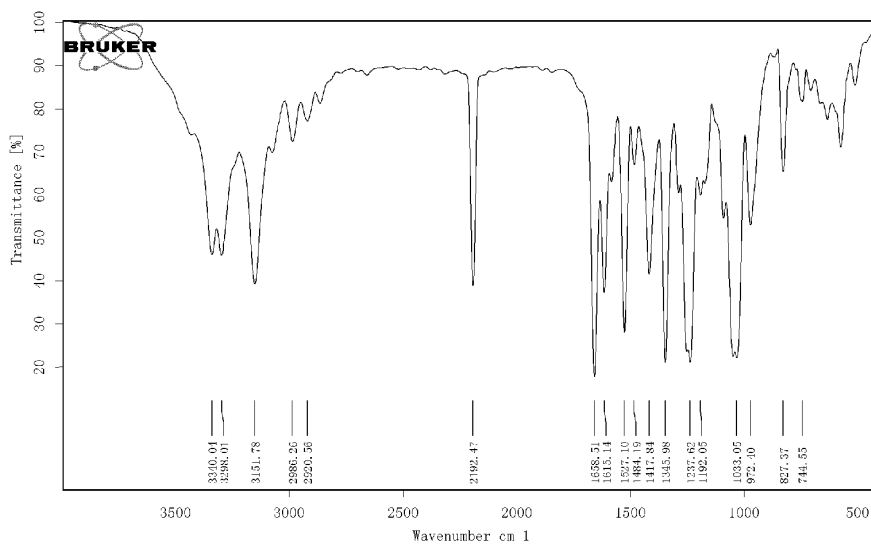

|                                             |                    |                                    |          |
|---------------------------------------------|--------------------|------------------------------------|----------|
| C:\OPUS 7.0.129\MEAS\Sample description.644 | Sample description | Instrument type and / or accessory | 2014-5-6 |
|---------------------------------------------|--------------------|------------------------------------|----------|

Page 1 of 1

**4h. diethyl 2-amino-3-cyano-6-nitro-4H-chromen-4-ylphosphonate**



Copies of  $^1\text{H-NMR}$  Spectra for Compounds 4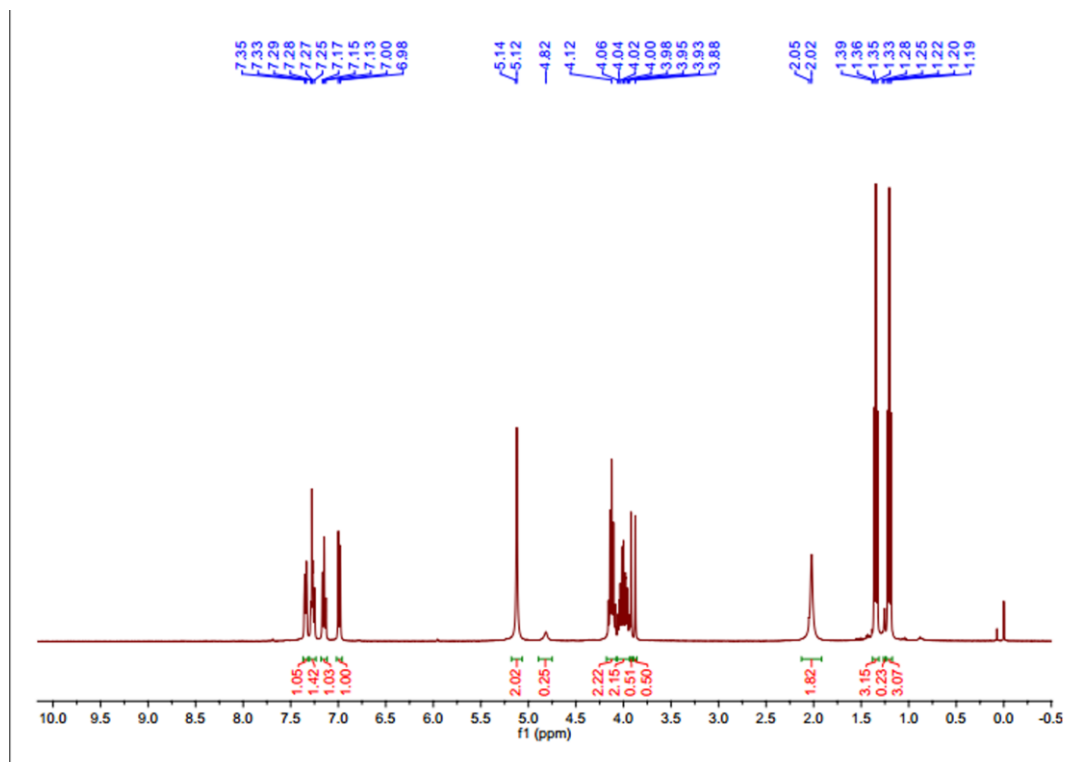

4a. diethyl 2-amino-3-cyano-4H-chromen-4-ylphosphonate

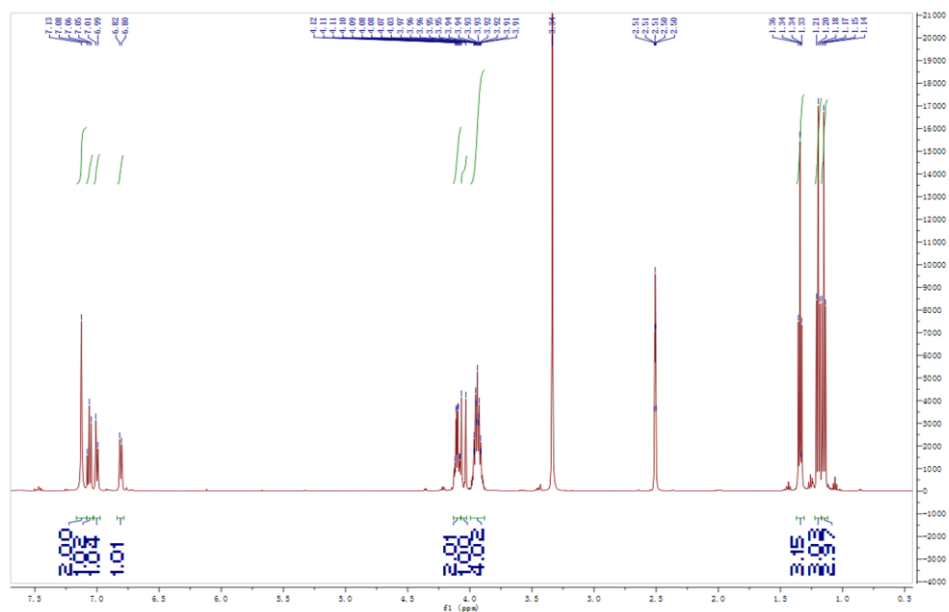

4b. diethyl 2-amino-3-cyano-8-ethoxy-4H-chromen-4-ylphosphonate

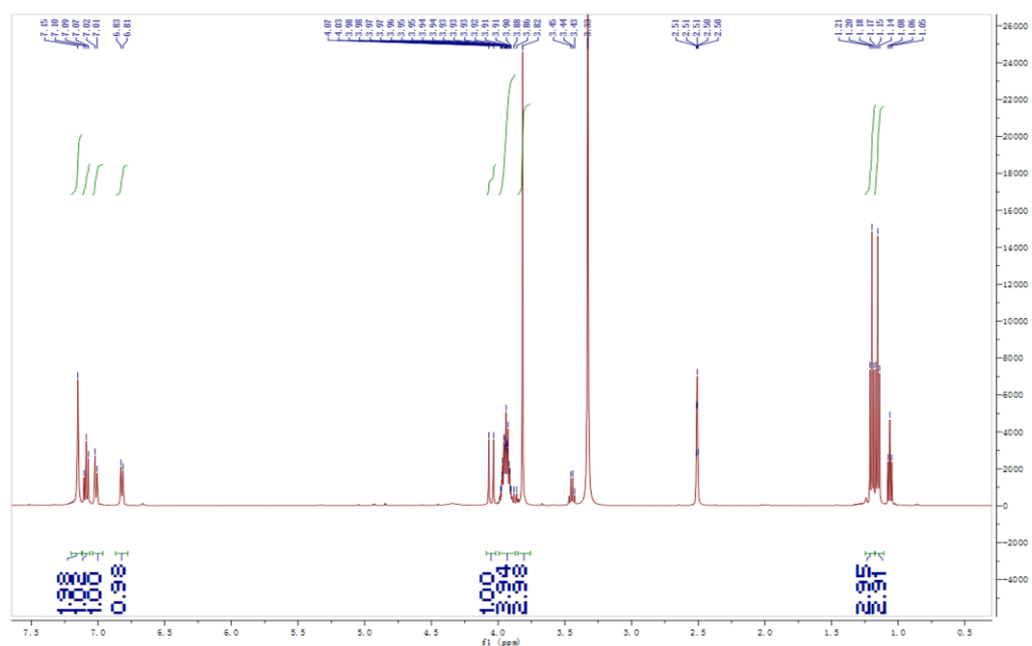

4c. diethyl 2-amino-3-cyano-8-methoxy-4H-chromen-4-ylphosphonate

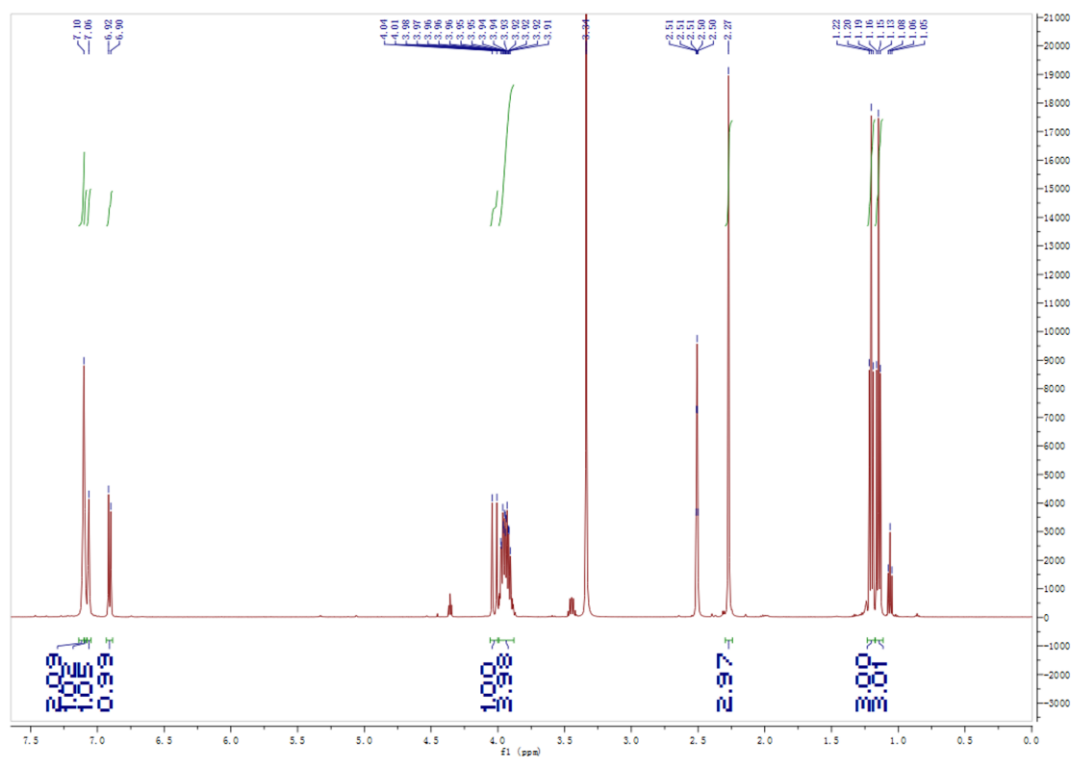

4d. diethyl 2-amino-3-cyano-6-methyl-4H-chromen-4-ylphosphonate

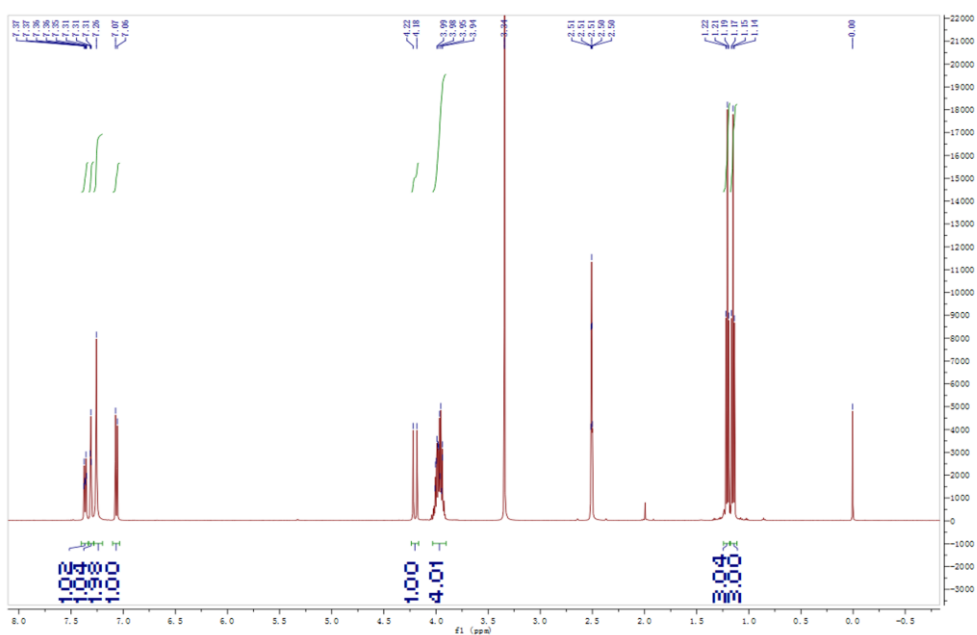

4e. diethyl 2-amino-6-chloro-3-cyano-4H-chromen-4-ylphosphonate

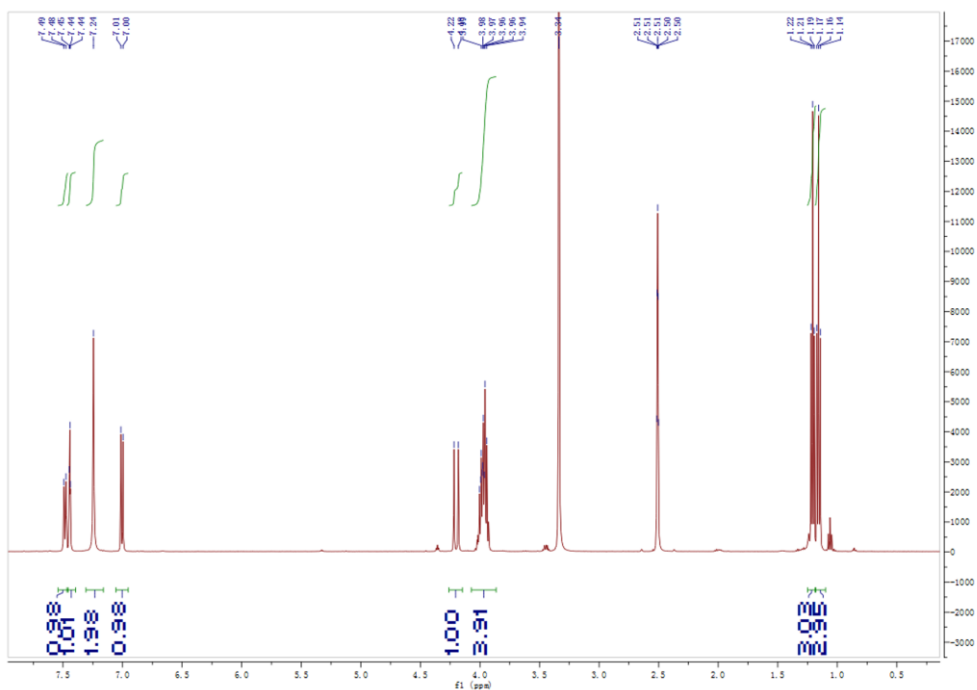

4f. diethyl 2-amino-6-bromo-3-cyano-4H-chromen-4-ylphosphonate

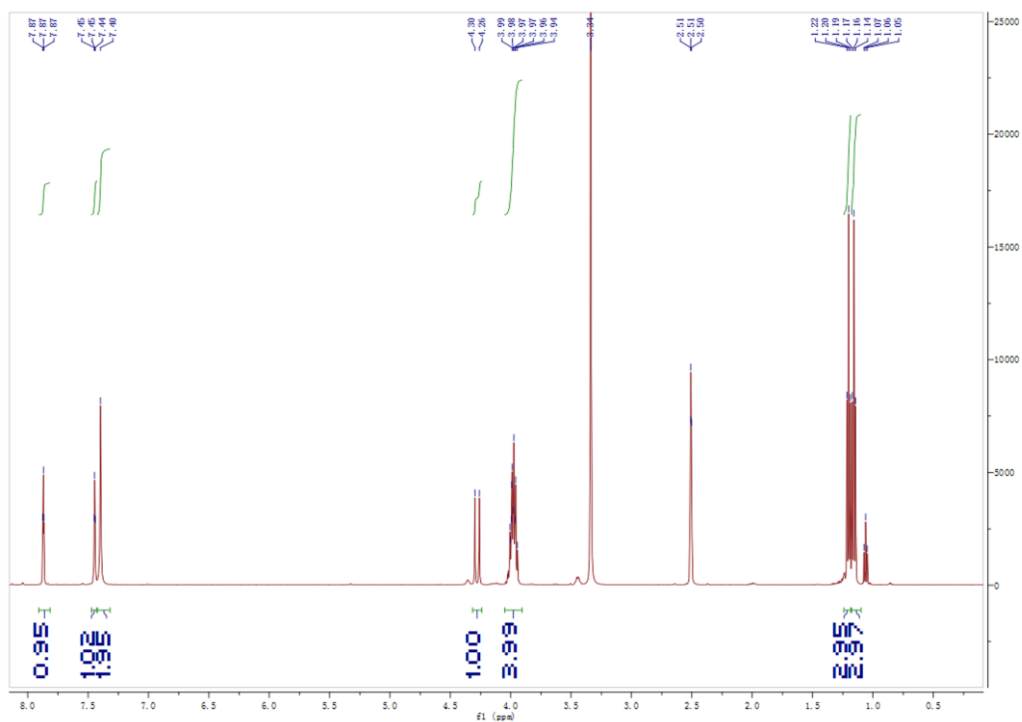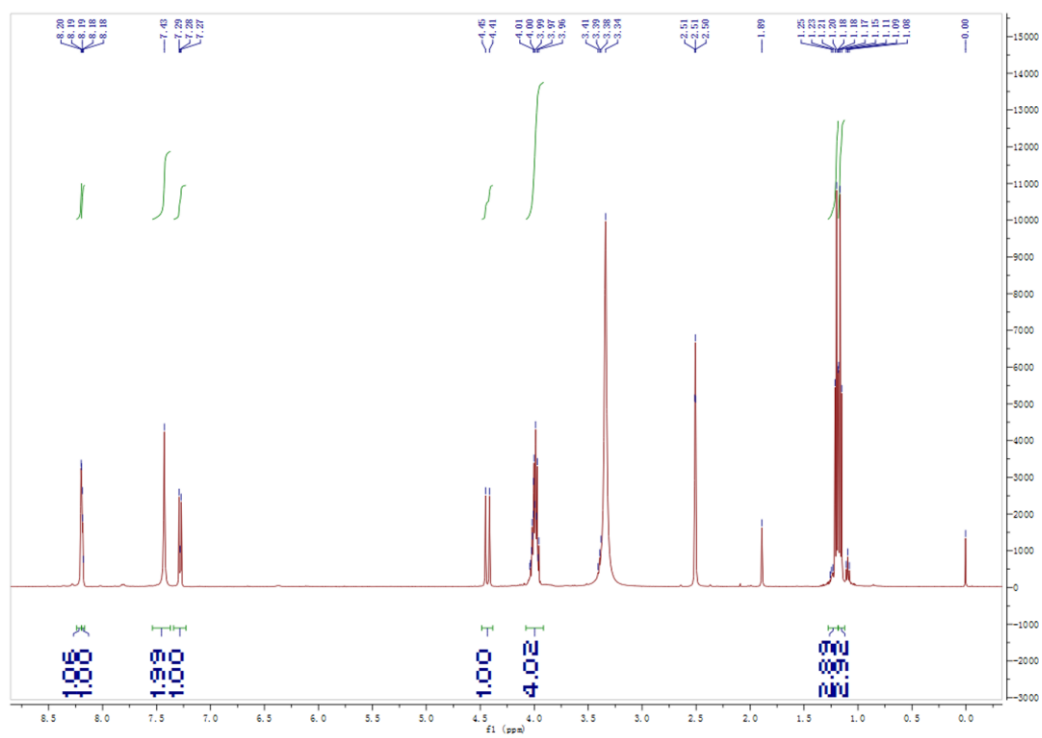

Copies of  $^{13}\text{C}$ -NMR Spectra for Compounds 4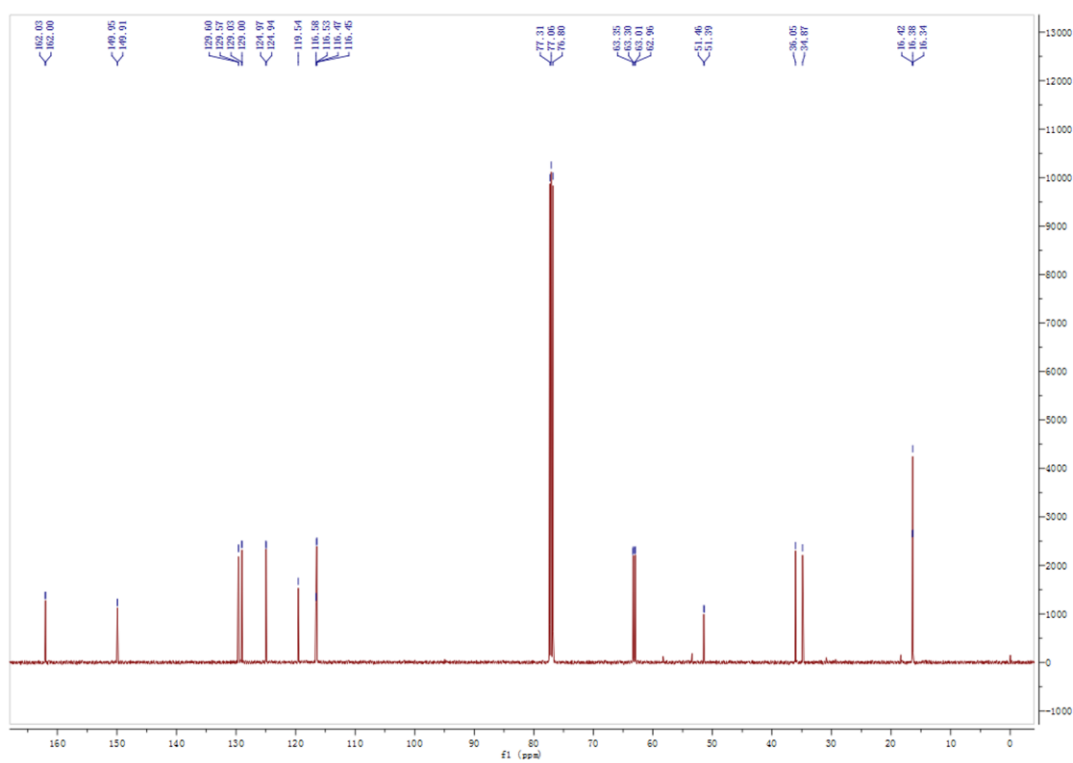

4a, diethyl 2-amino-3-cyano-4H-chromen-4-ylphosphonate

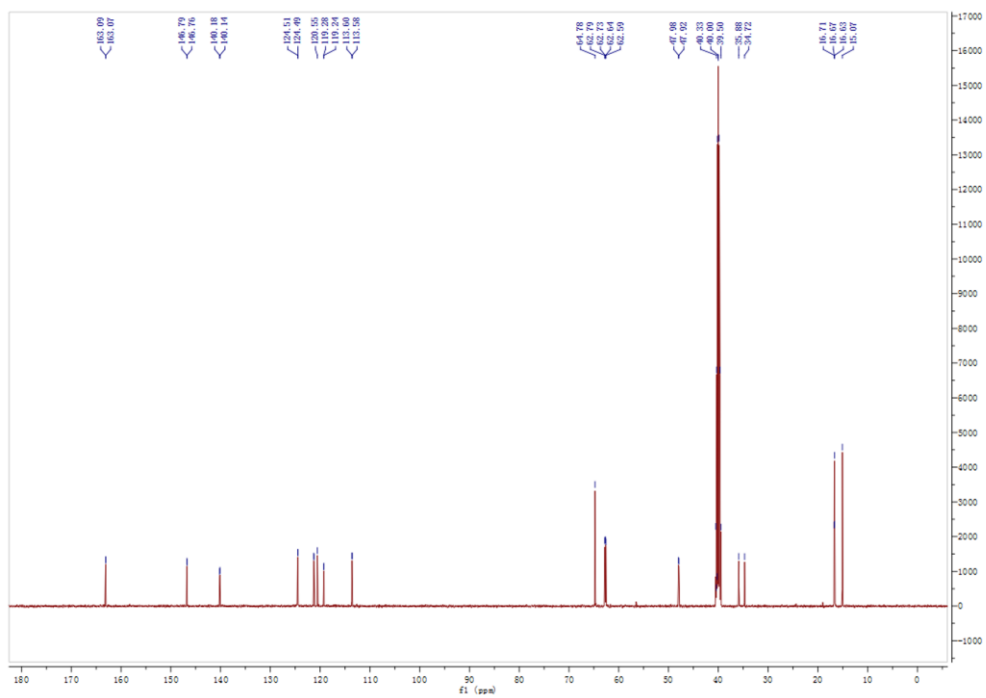

4b, diethyl 2-amino-3-cyano-8-ethoxy-4H-chromen-4-ylphosphonate

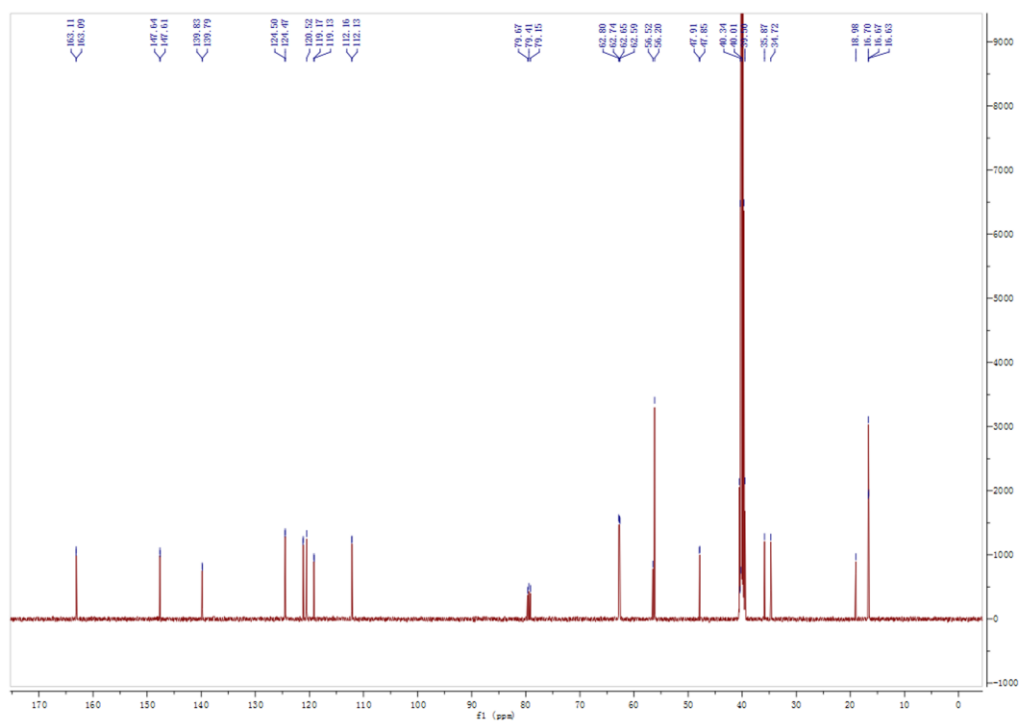

4c. diethyl 2-amino-3-cyano-8-methoxy-4H-chromen-4-ylphosphonate

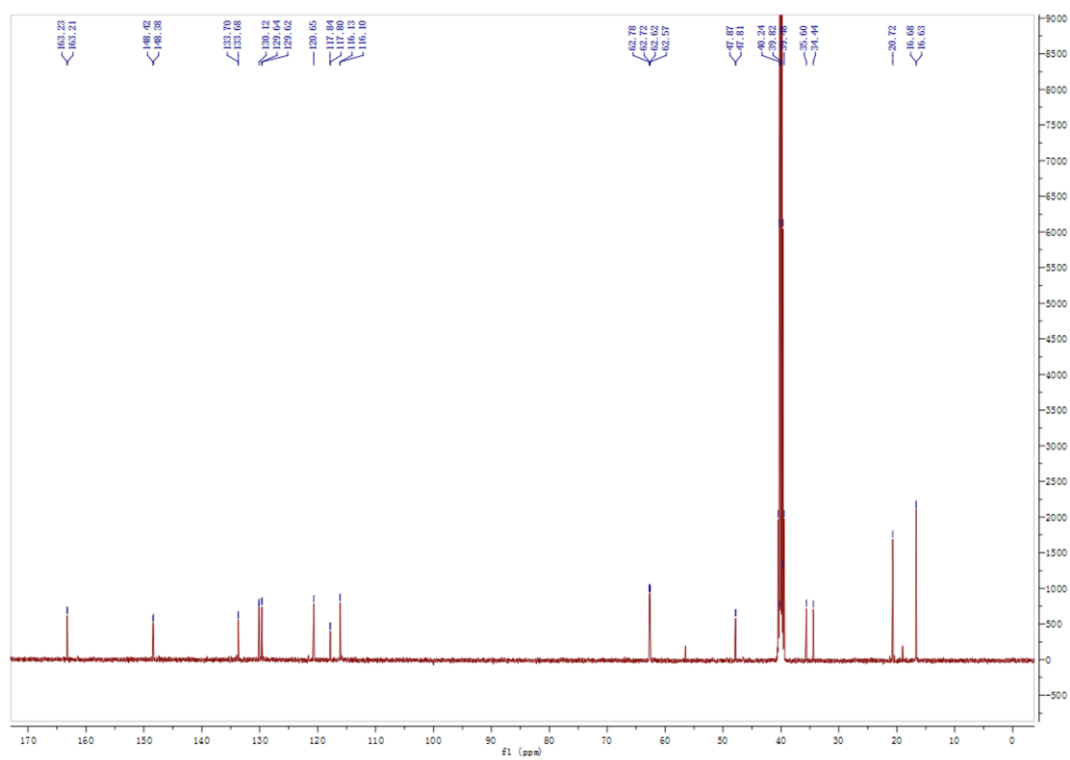

4d. diethyl 2-amino-3-cyano-6-methyl-4H-chromen-4-ylphosphonate

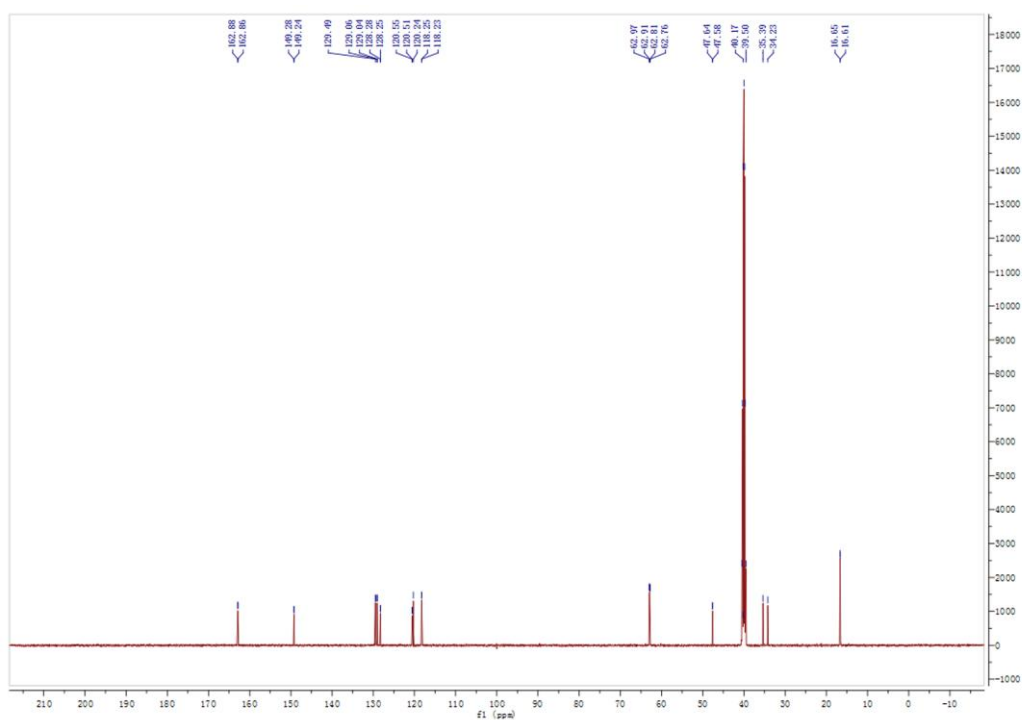

4e. diethyl 2-amino-6-chloro-3-cyano-4H-chromen-4-ylphosphonate

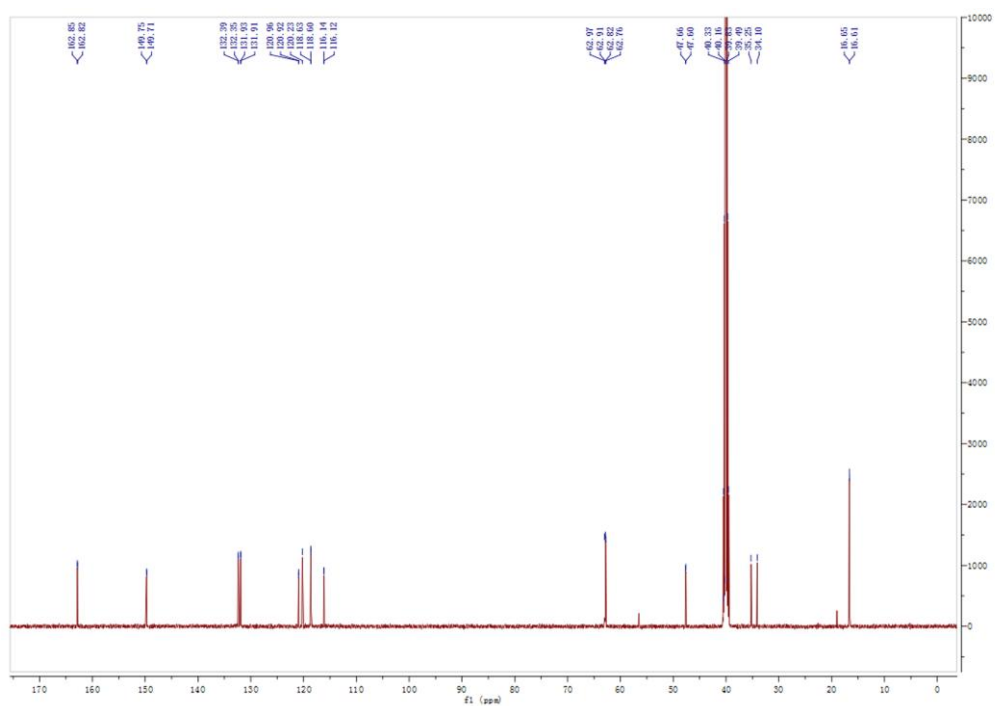

4f. diethyl 2-amino-6-bromo-3-cyano-4H-chromen-4-ylphosphonate

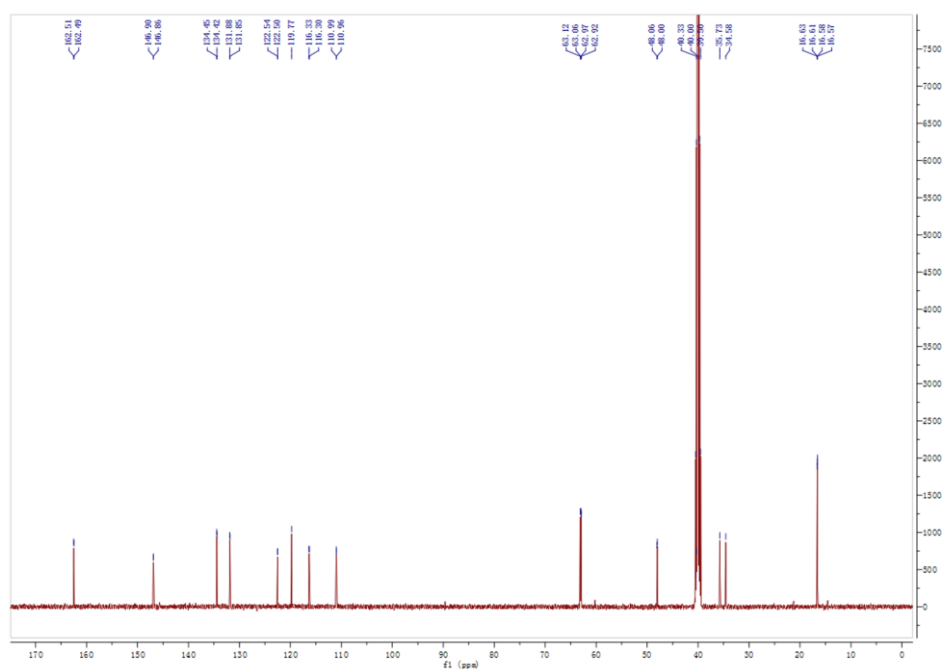

**4g. diethyl 2-amino-6, 8-dibromo-3-cyano-4H-chromen-4-ylphosphonate**

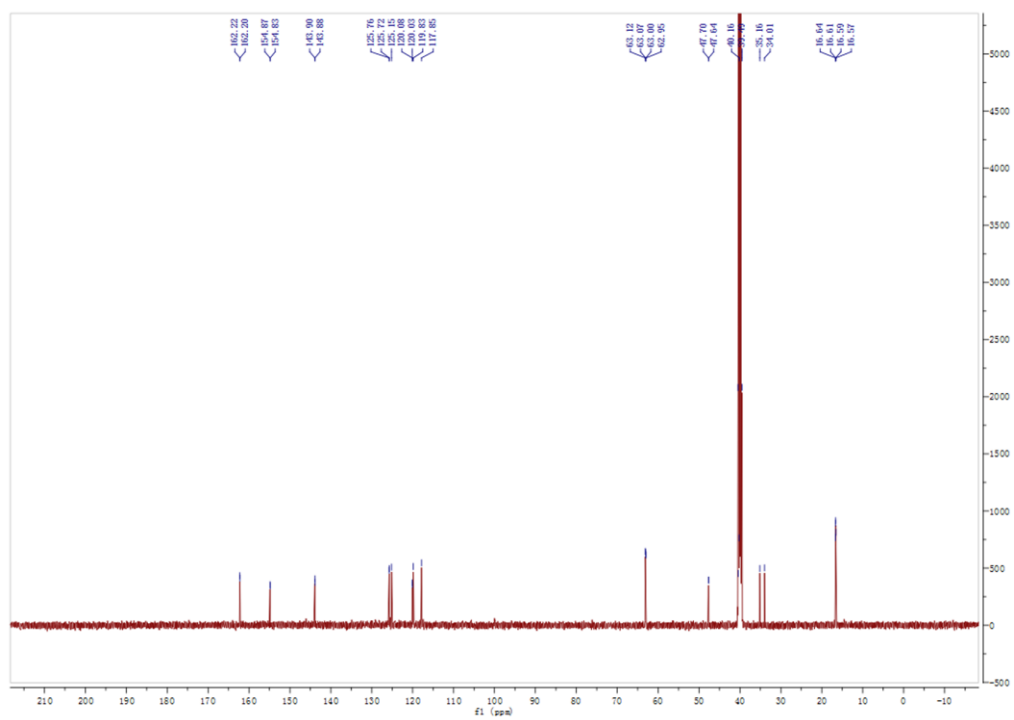

**4h. diethyl 2-amino-3-cyano-6-nitro-4H-chromen-4-ylphosphonate**



Copies of  $^{31}\text{P}$ -NMR Spectra for Compounds 4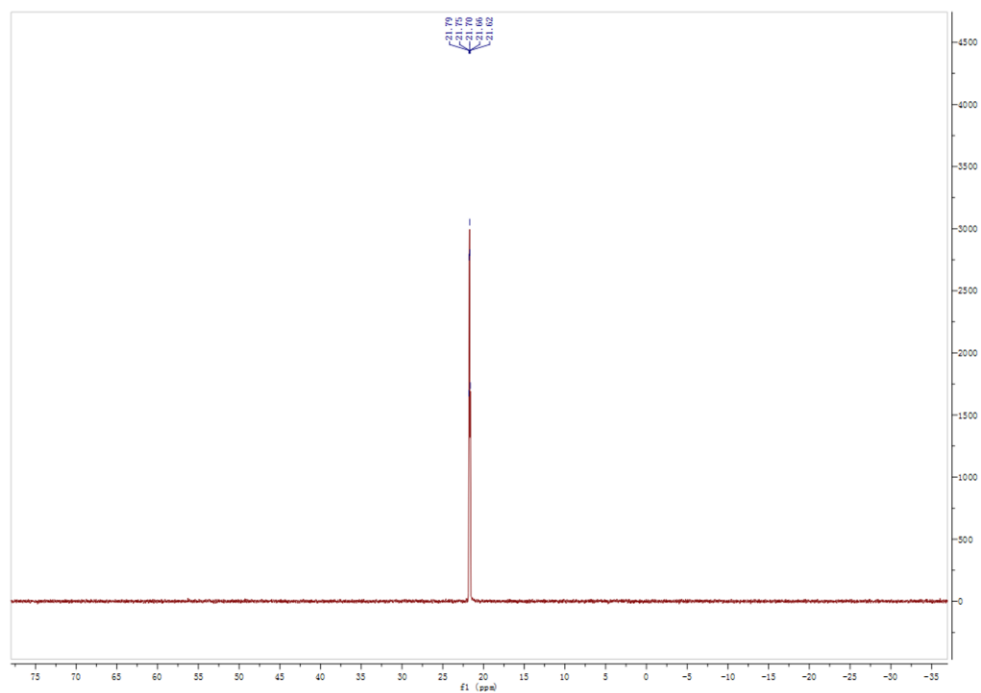**4a. diethyl 2-amino-3-cyano-4H-chromen-4-ylphosphonate**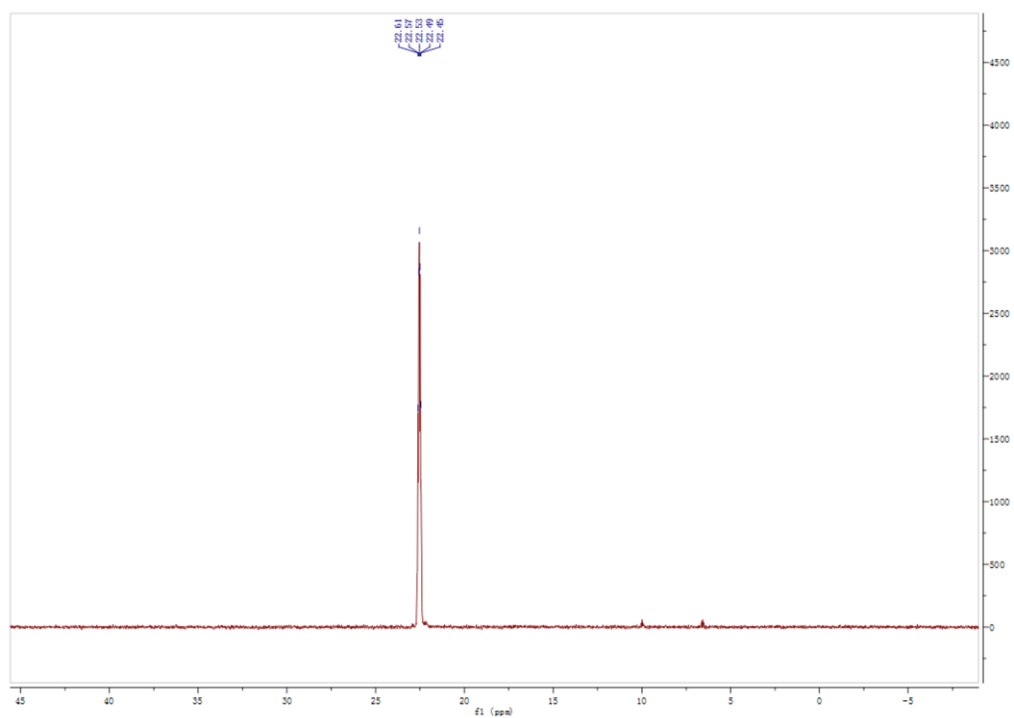**4b. diethyl 2-amino-3-cyano-8-ethoxy-4H-chromen-4-ylphosphonate**

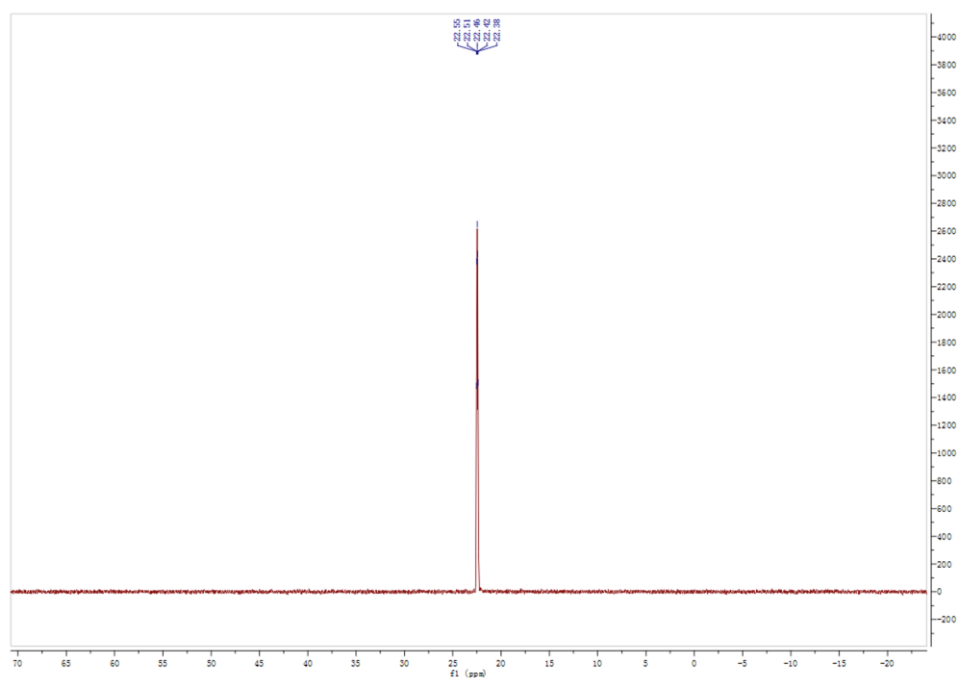

**4c. diethyl 2-amino-3-cyano-8-methoxy-4H-chromen-4-ylphosphonate**

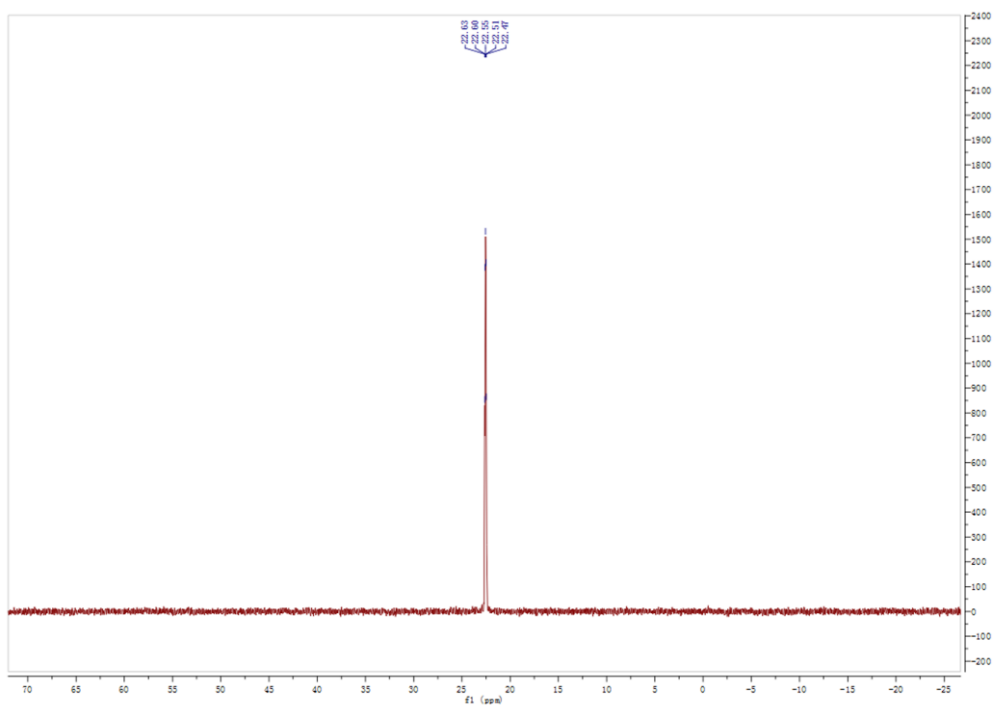

**4d. diethyl 2-amino-3-cyano-6-methyl-4H-chromen-4-ylphosphonate**

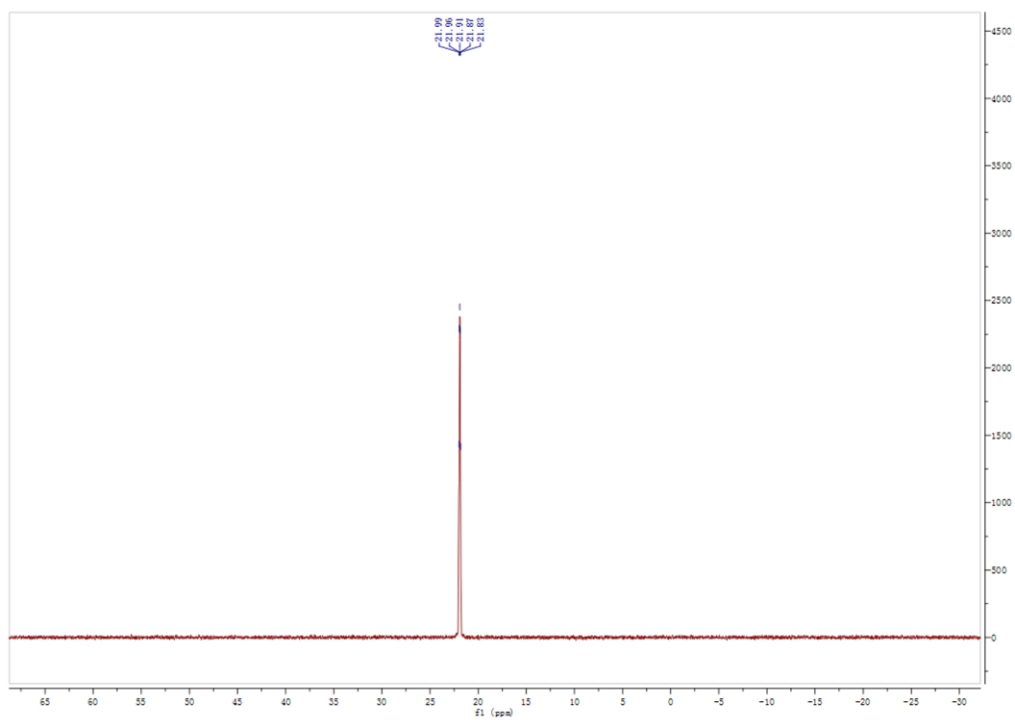

**4e.** diethyl 2-amino-6-chloro-3-cyano-4H-chromen-4-ylphosphonate

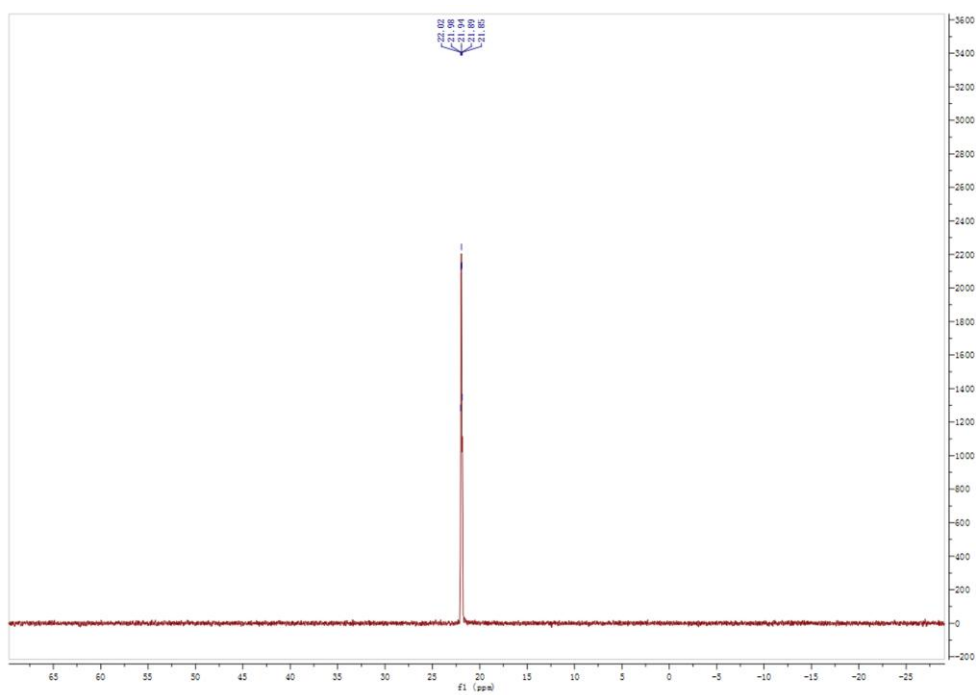

**4f.** diethyl 2-amino-6-bromo-3-cyano-4H-chromen-4-ylphosphonate

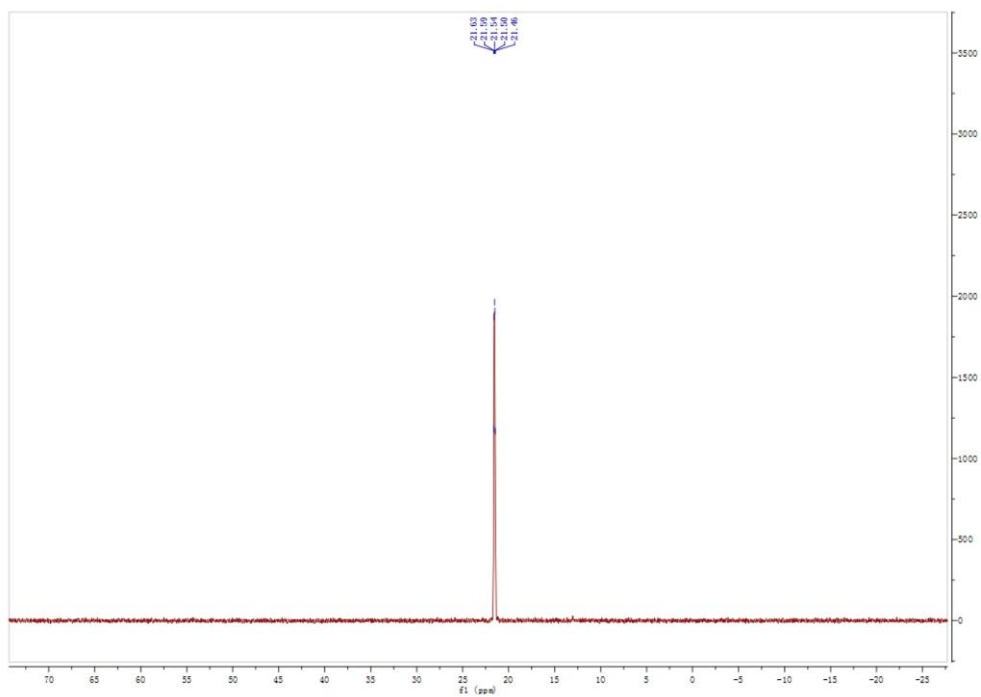

**4g. diethyl 2-amino-6, 8-dibromo-3-cyano-4H-chromen-4-ylphosphonate**

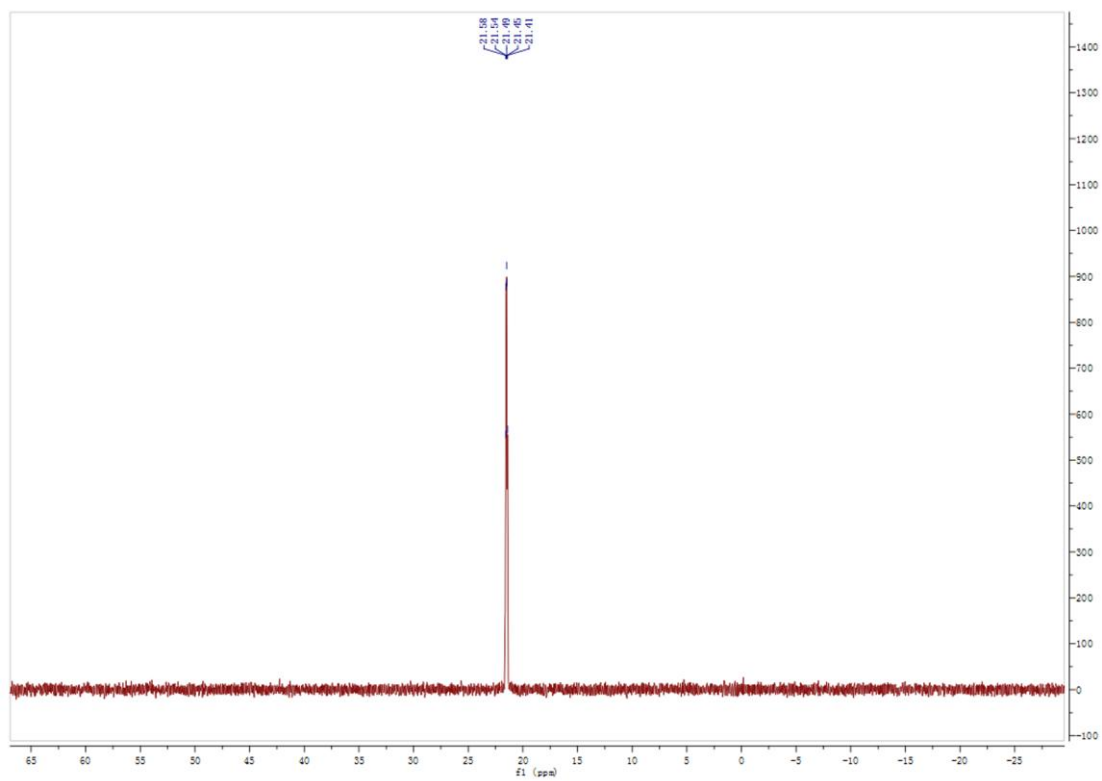

**4h. diethyl 2-amino-3-cyano-6-nitro-4H-chromen-4-ylphosphonate**

## Copies of MS Spectra for Compounds 4

0519-1 140610152053 #231 RT: 1.59 AV: 1 NL: 1.41E6  
T: ITMS + cESI Full ms [50.00-1000.00]

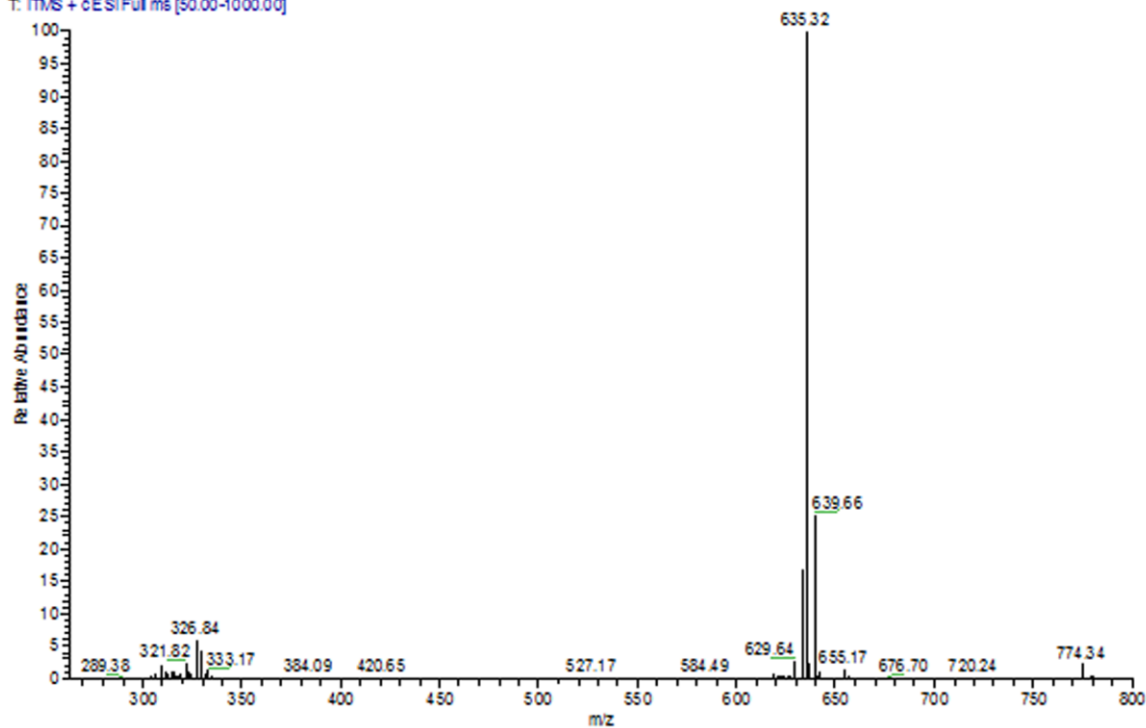

4a, diethyl 2-amino-3-cyano-4H-chromen-4-ylphosphonate

0519-2 140518095334 #270 RT: 1.81 AV: 1 NL: 1.14E5  
T: ITMS + cESI 6id=35.00 Full ms [50.00-1000.00]

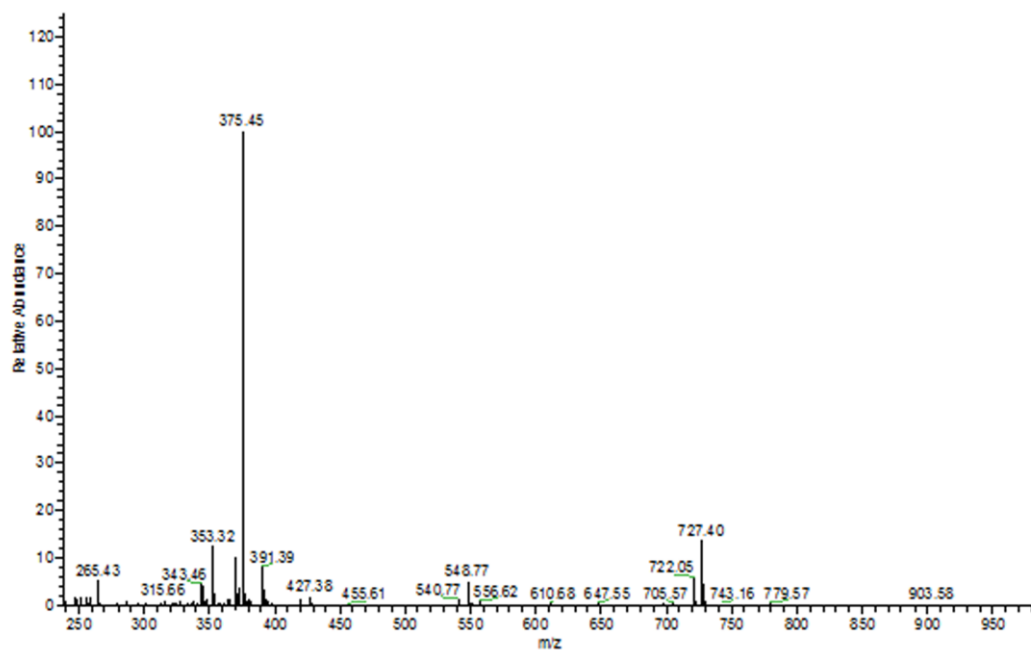

4b, diethyl 2-amino-3-cyano-8-ethoxy-4H-chromen-4-ylphosphonate

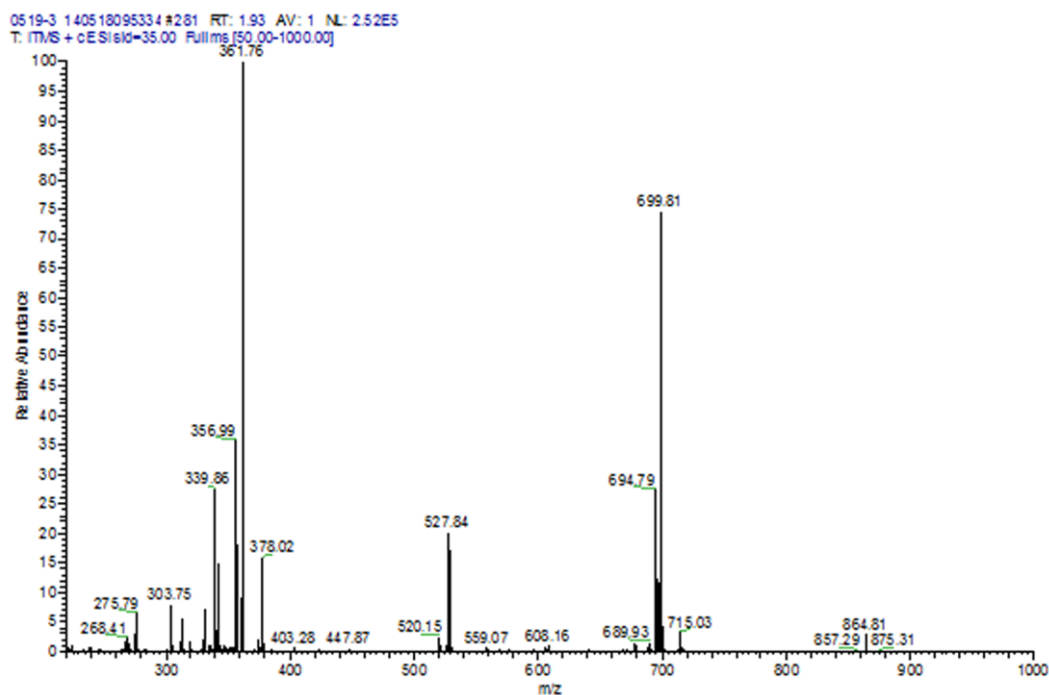

4c. diethyl 2-amino-3-cyano-8-methoxy-4H-chromen-4-ylphosphonate

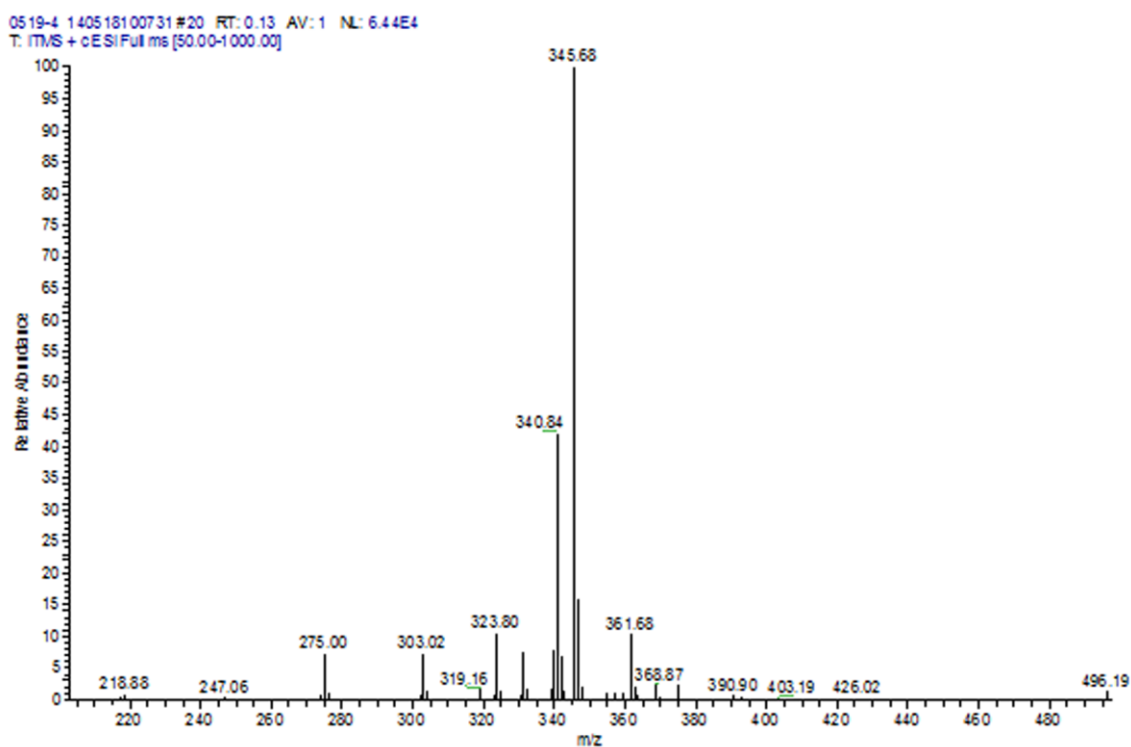

4d. diethyl 2-amino-3-cyano-6-methyl-4H-chromen-4-ylphosphonate

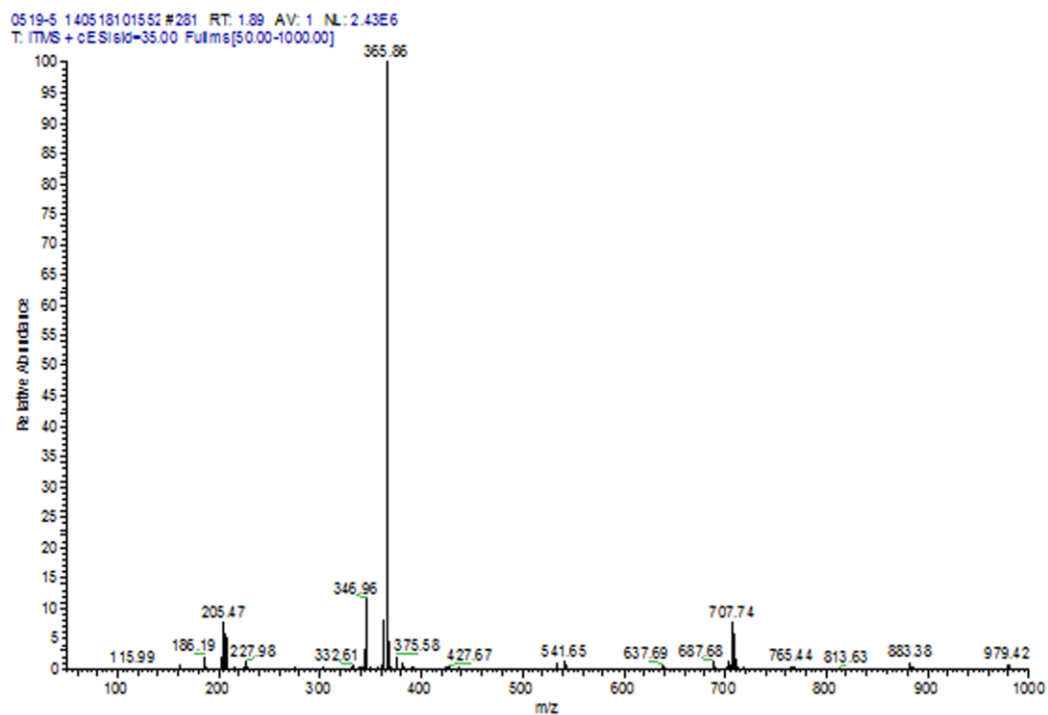

4e. diethyl 2-amino-6-chloro-3-cyano-4H-chromen-4-ylphosphonate

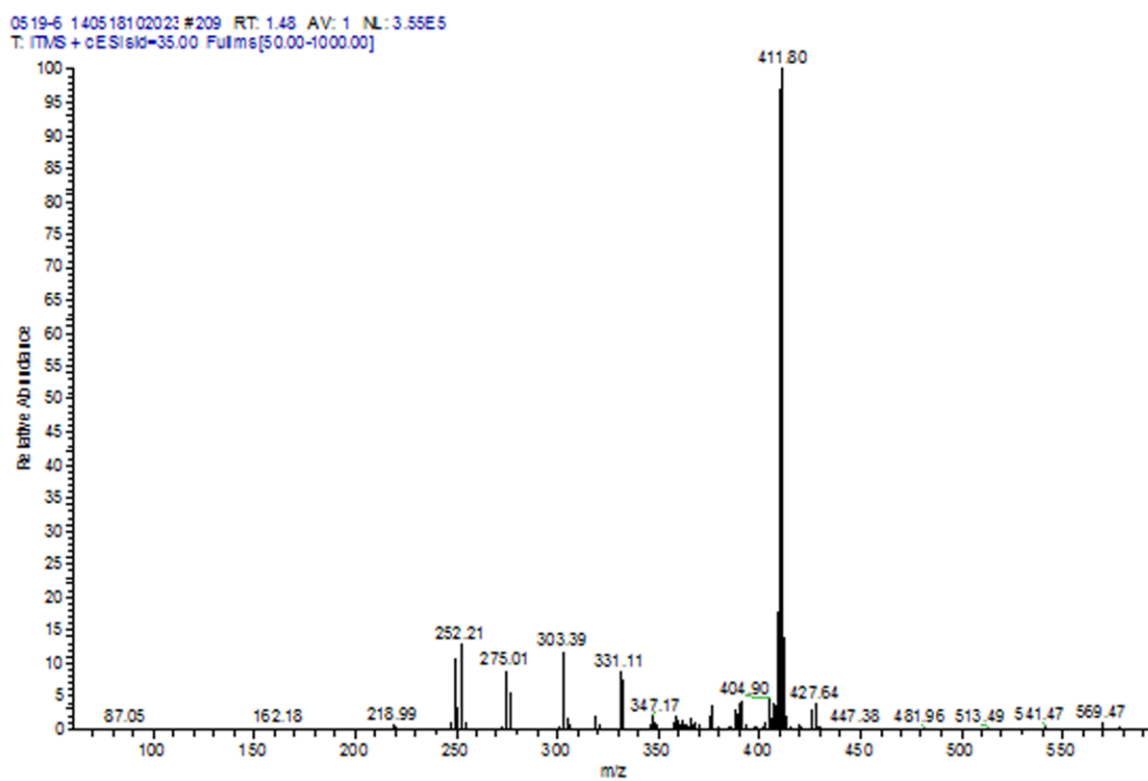

4f. diethyl 2-amino-6-bromo-3-cyano-4H-chromen-4-ylphosphonate

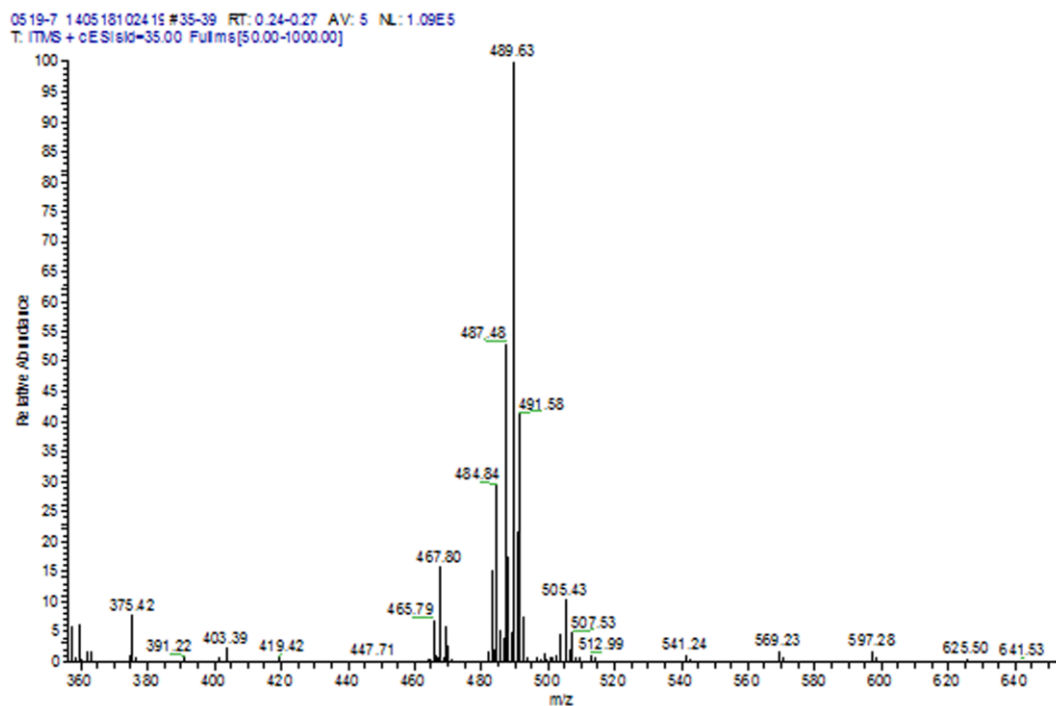

4g. diethyl 2-amino-6, 8-dibromo-3-cyano-4H-chromen-4-ylphosphonate

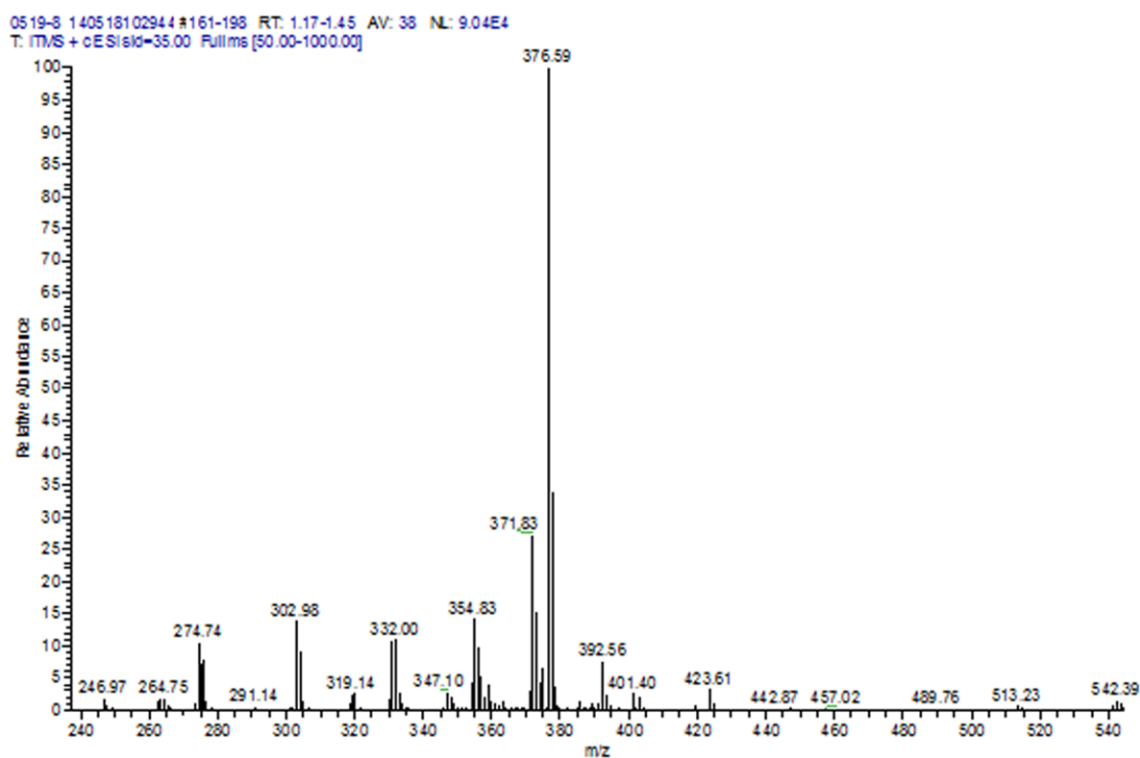

4h. diethyl 2-amino-3-cyano-6-nitro-4H-chromen-4-ylphosphonate



## Copies of IR Spectra for Compounds 7

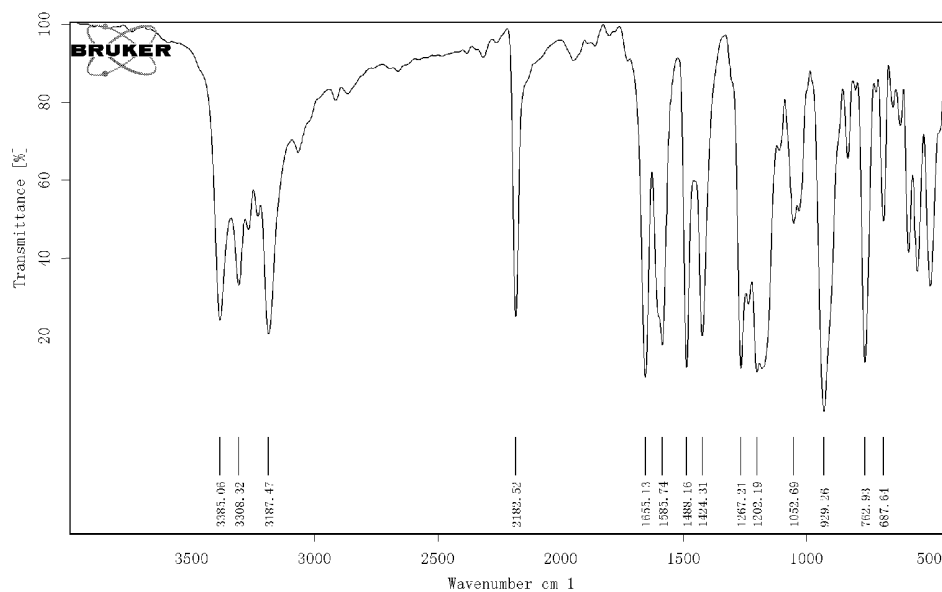

|                                             |                    |                                    |          |
|---------------------------------------------|--------------------|------------------------------------|----------|
| C:\OPUS 7.0.129\MEAS\Sample description.650 | Sample description | Instrument type and / or accessory | 2014-5-6 |
|---------------------------------------------|--------------------|------------------------------------|----------|

Page 1 of 1

## 7a.diphenyl 2-amino-3-cyano-4H-chromen-4-ylphosphonate

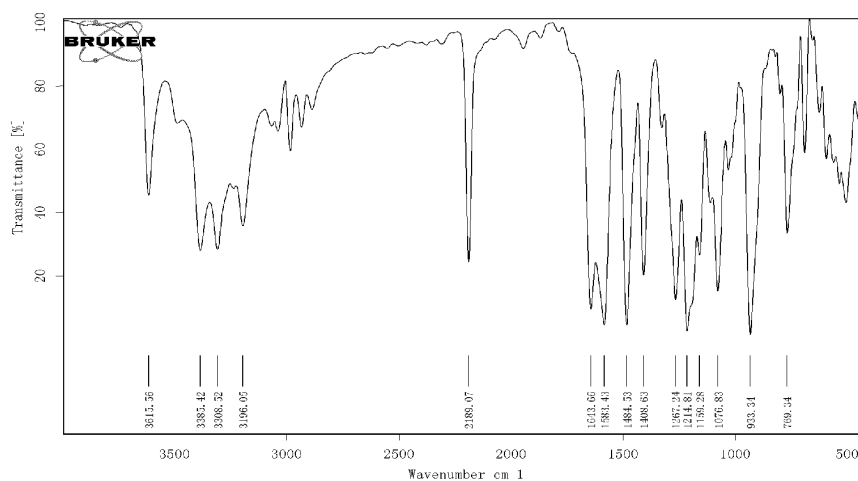

|                                             |                    |                                    |          |
|---------------------------------------------|--------------------|------------------------------------|----------|
| C:\OPUS 7.0.129\MEAS\Sample description.652 | Sample description | Instrument type and / or accessory | 2014-5-6 |
|---------------------------------------------|--------------------|------------------------------------|----------|

Page 1 of 1

## 7b.diphenyl 2-amino-3-cyano-8-ethoxy-4H-chromen-4-ylphosphonate

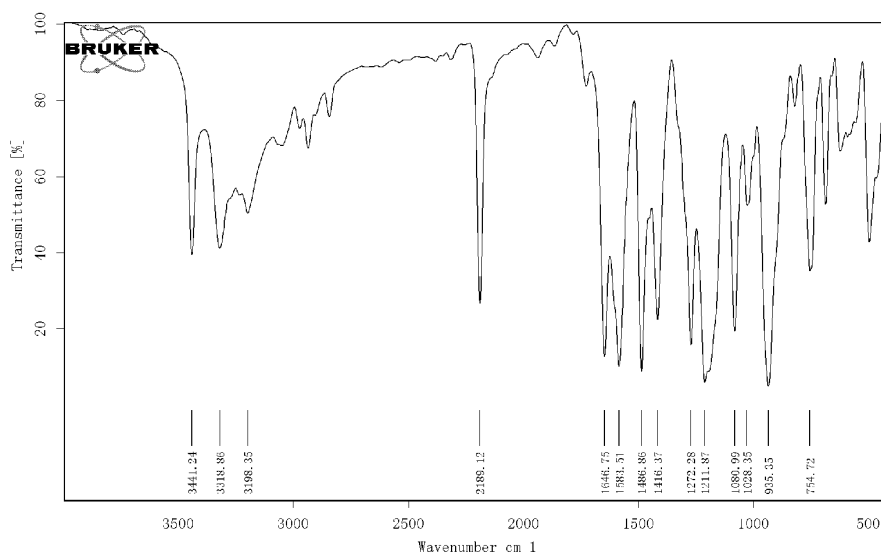

C:\VOPUS 7.0.129\MEAS\Sample description.653

Sample description

Instrument type and / or accessory

2014-5-6

Page 1 of 1

### 7c.diphenyl 2-amino-3-cyano-8-methoxy-4H-chromen-4-ylphosphonate

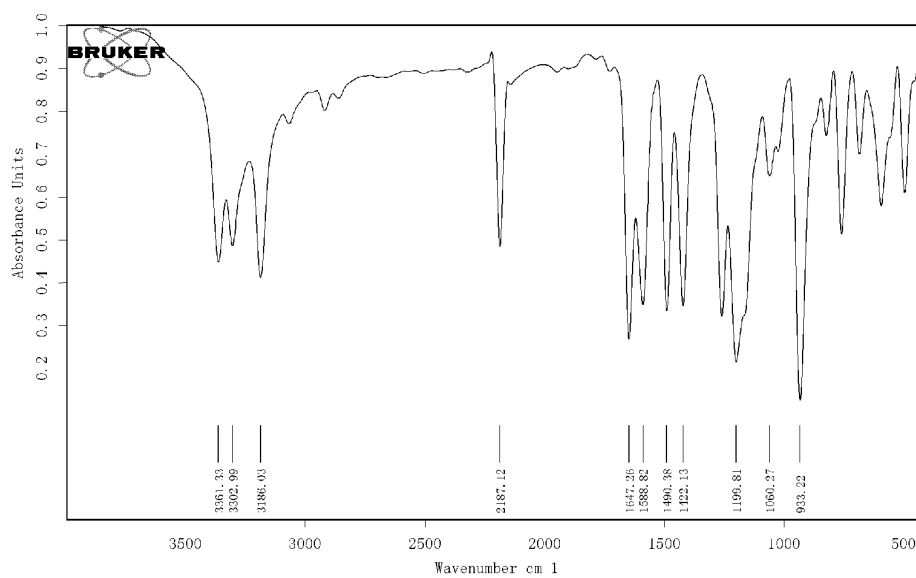

E:\tr\中永存2\5-甲基氰脲三苯基. dpt

Page 1 of 1

### 7d.diphenyl 2-amino-3-cyano-6-methyl-4H-chromen-4-ylphosphonate

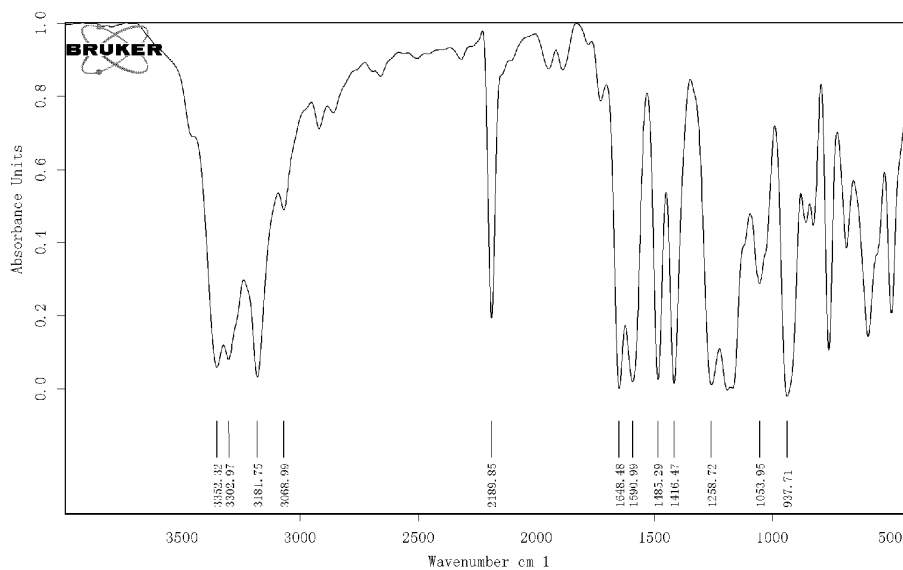

E:\tr\中永存2\5-氨基磷酸二苯酯.dpr

Page 1 of 1

**7e.diphenyl 2-amino-6-chloro-3-cyano-4H-chromen-4-ylphosphonate**

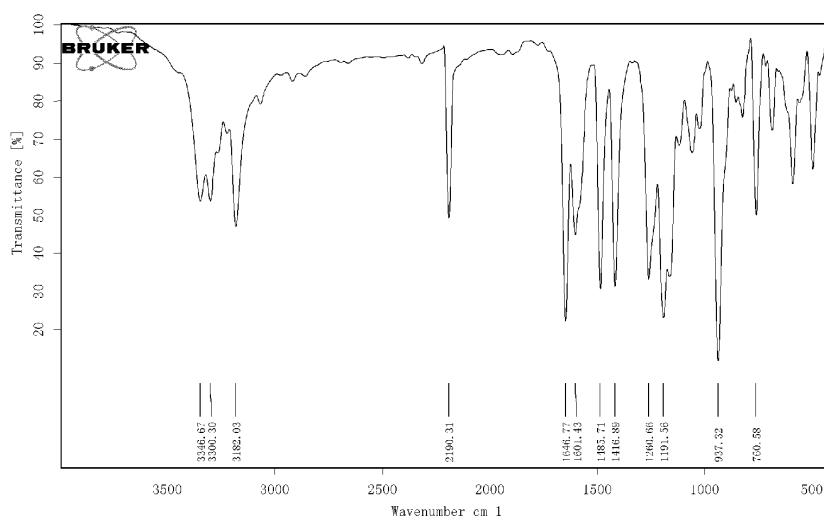

C:\OPUS 7.0.128\WEAS\Sample description.651

Sample description

Instrument type and / or accessory

2014-5-6

Page 1 of 1

**7f.diphenyl 2-amino-6-bromo-3-cyano-4H-chromen-4-ylphosphonate**

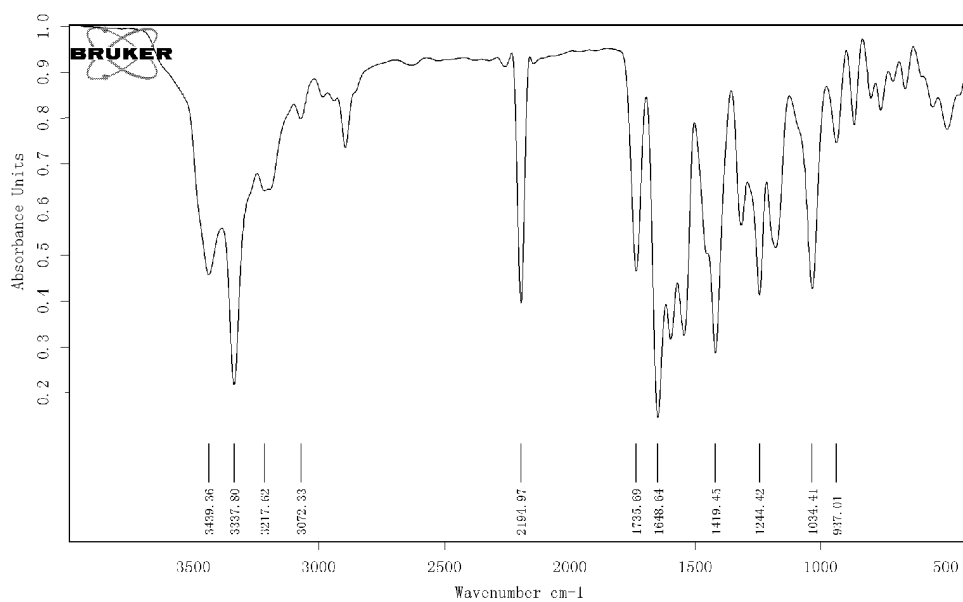

E:\tt\甲水存2\3, 5 二溴水杨醛二甲肼.dpt

Page 1 of 1

**7g.diphenyl 2-amino-6, 8-dibromo-3-cyano-4H-chromen-4-ylphosphonate**

Copies of  $^1\text{H-NMR}$  Spectra for Compounds 7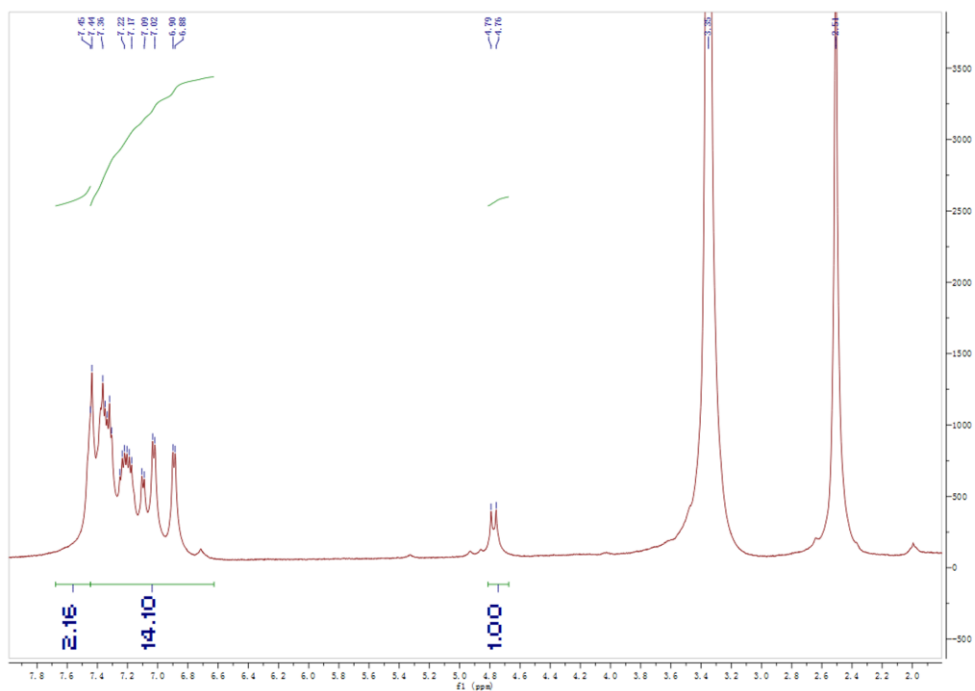

7a.diphenyl 2-amino-3-cyano-4H-chromen-4-ylphosphonate

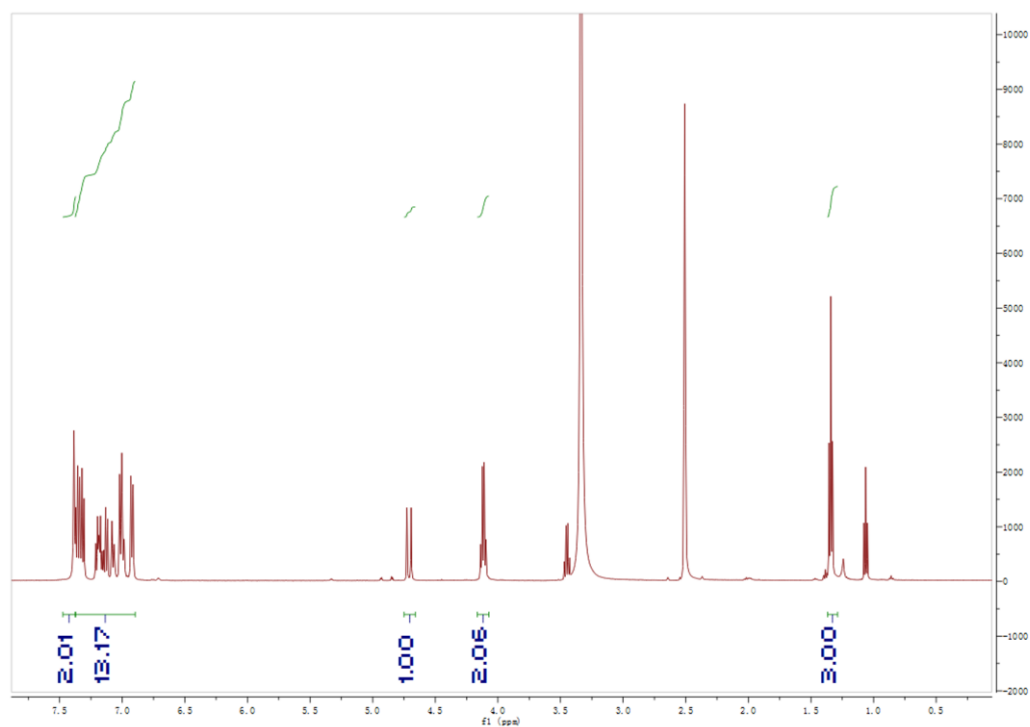

7b.diphenyl 2-amino-3-cyano-8-ethoxy-4H-chromen-4-ylphosphonate

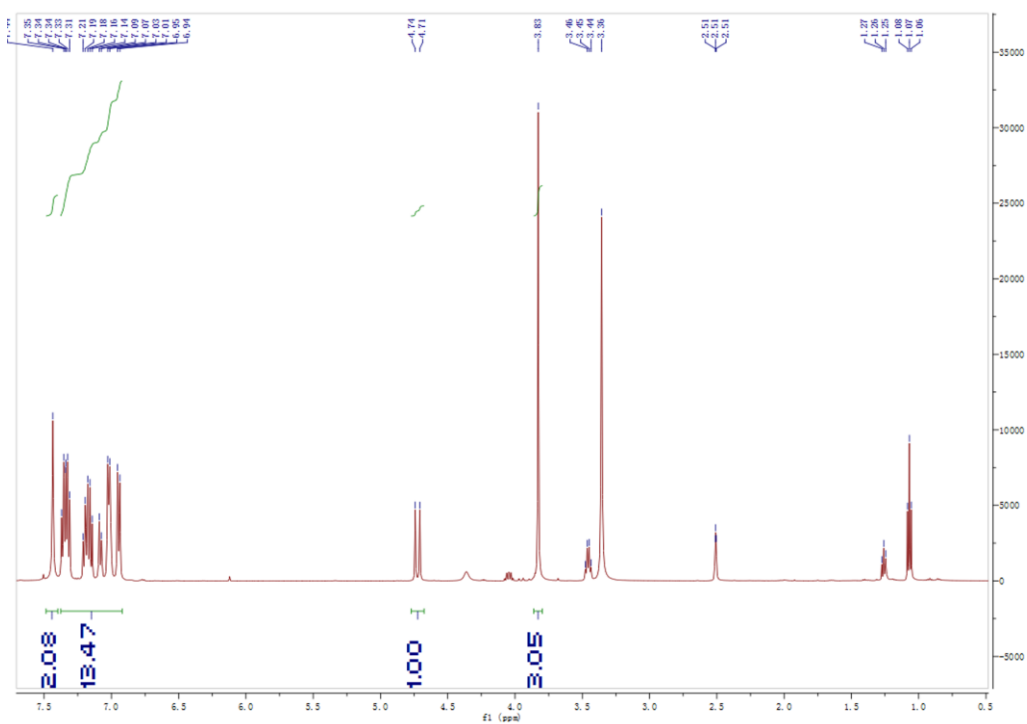

**7c.diphenyl 2-amino-3-cyano-8-methoxy-4H-chromen-4-ylphosphonate**

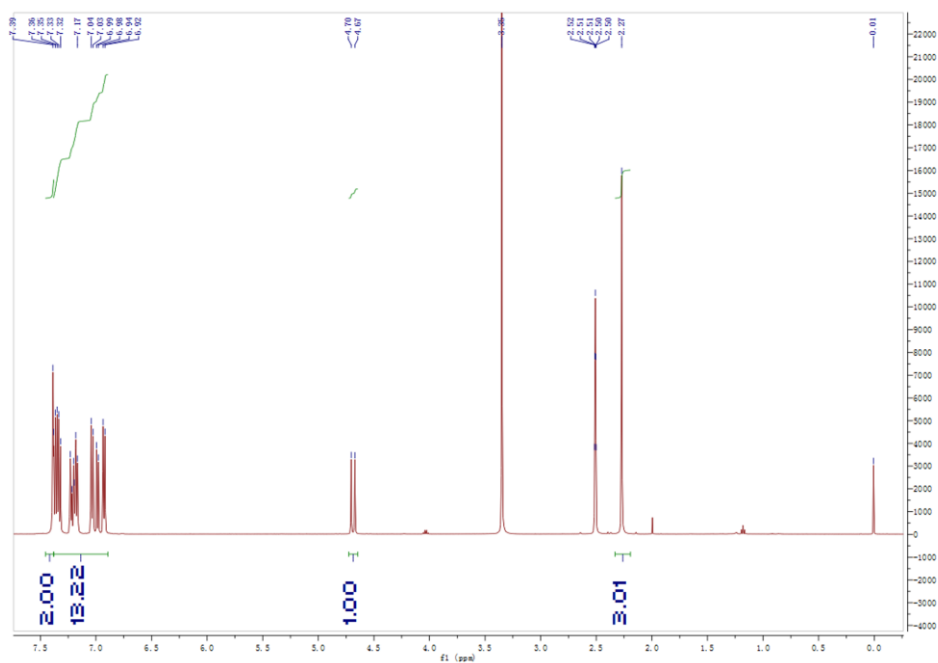

**7d.diphenyl 2-amino-3-cyano-6-methyl-4H-chromen-4-ylphosphonate**

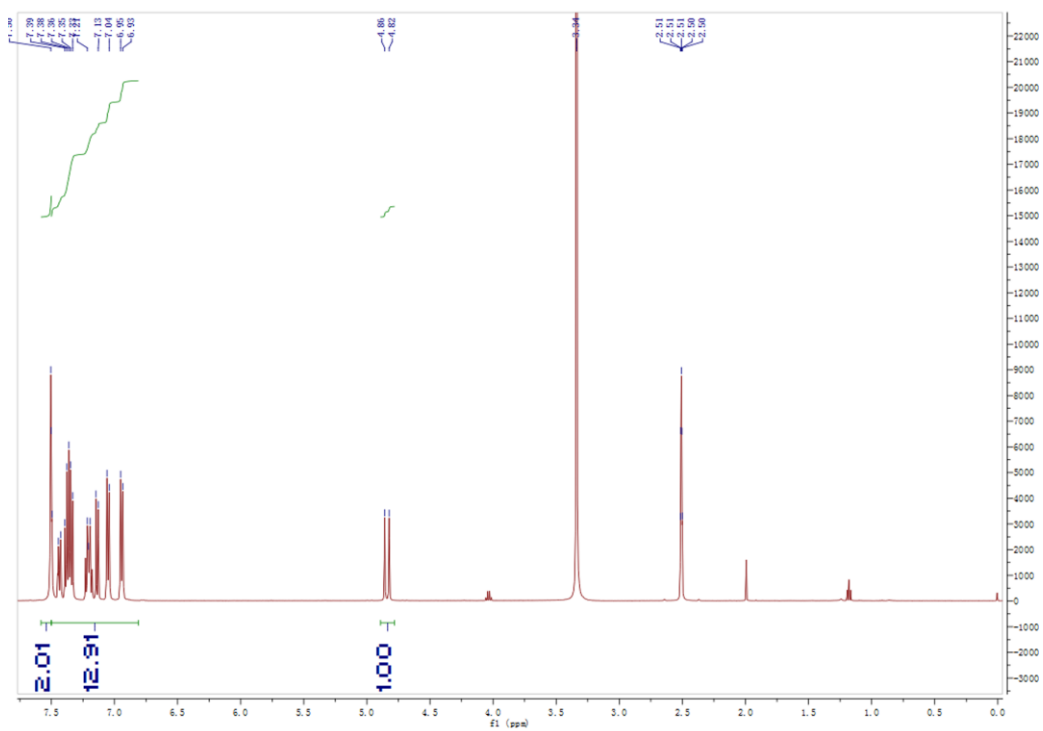

**7e.**diphenyl 2-amino-6-chloro-3-cyano-4H-chromen-4-ylphosphonate

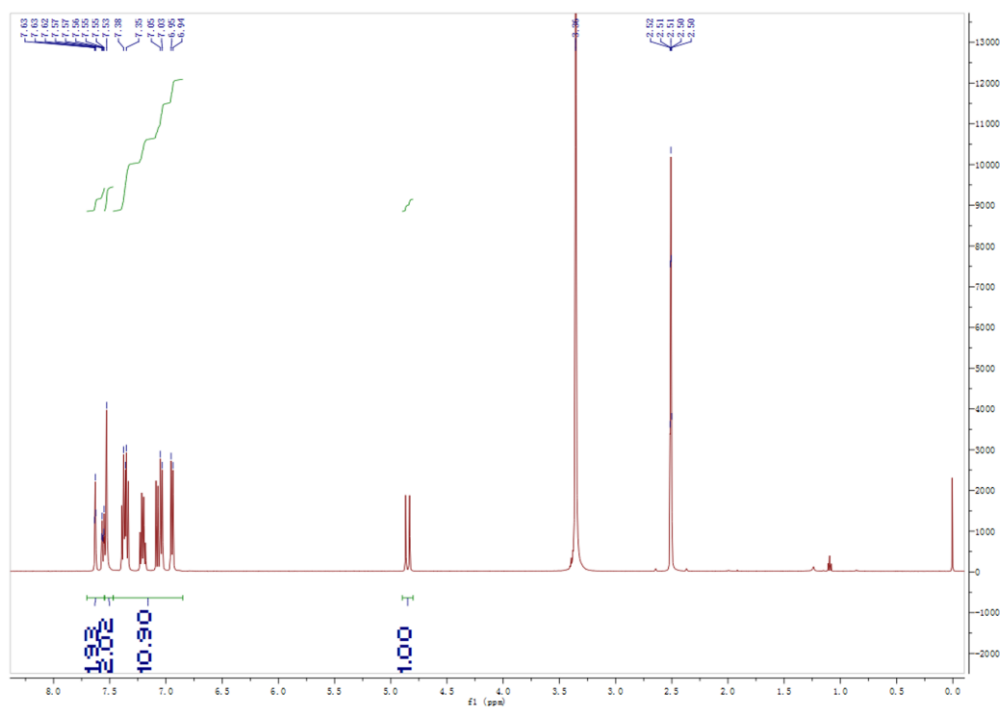

**7f.**diphenyl 2-amino-6-bromo-3-cyano-4H-chromen-4-ylphosphonate

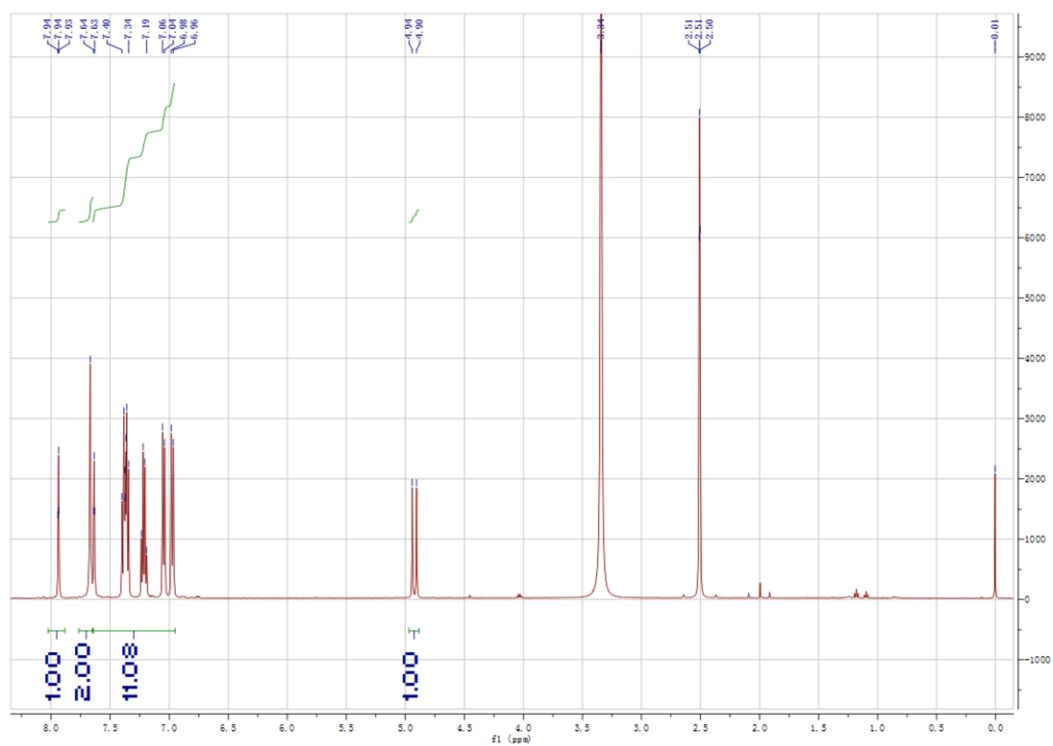

**7g**.diphenyl 2-amino-6, 8-dibromo-3-cyano-4H-chromen-4-ylphosphonate



Copies of  $^{13}\text{C}$ -NMR Spectra for Compounds 7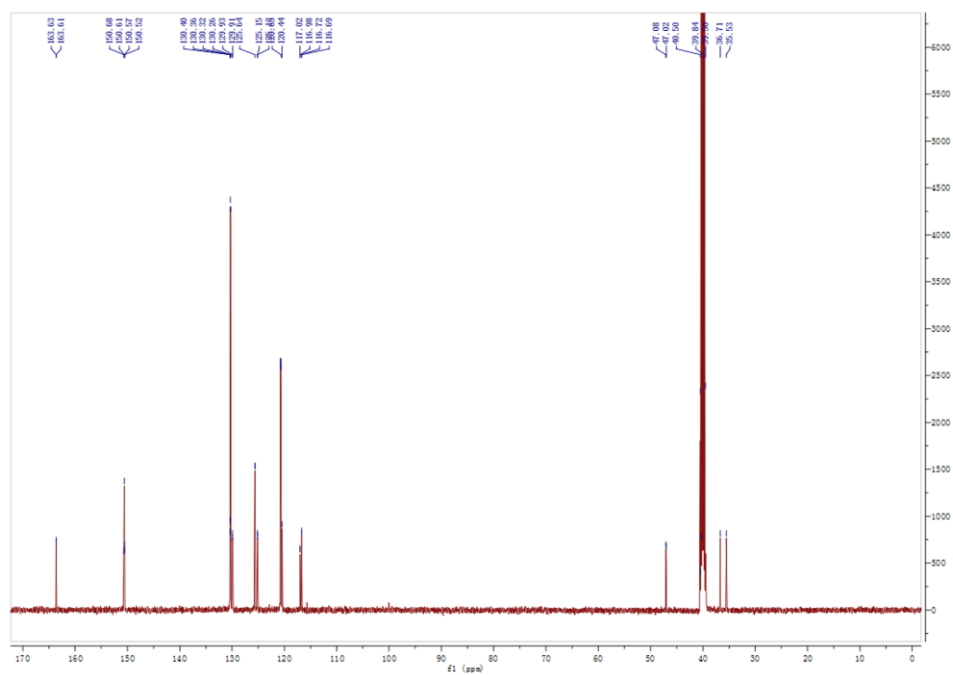

7a.diphenyl 2-amino-3-cyano-4H-chromen-4-ylphosphonate

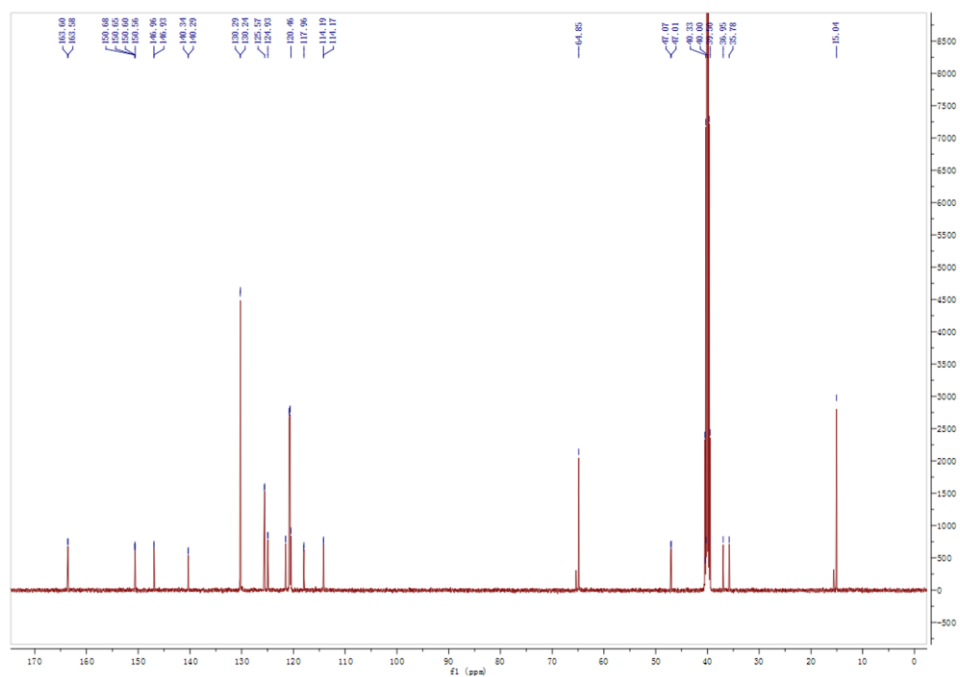

7b.diphenyl 2-amino-3-cyano-8-ethoxy-4H-chromen-4-ylphosphonate

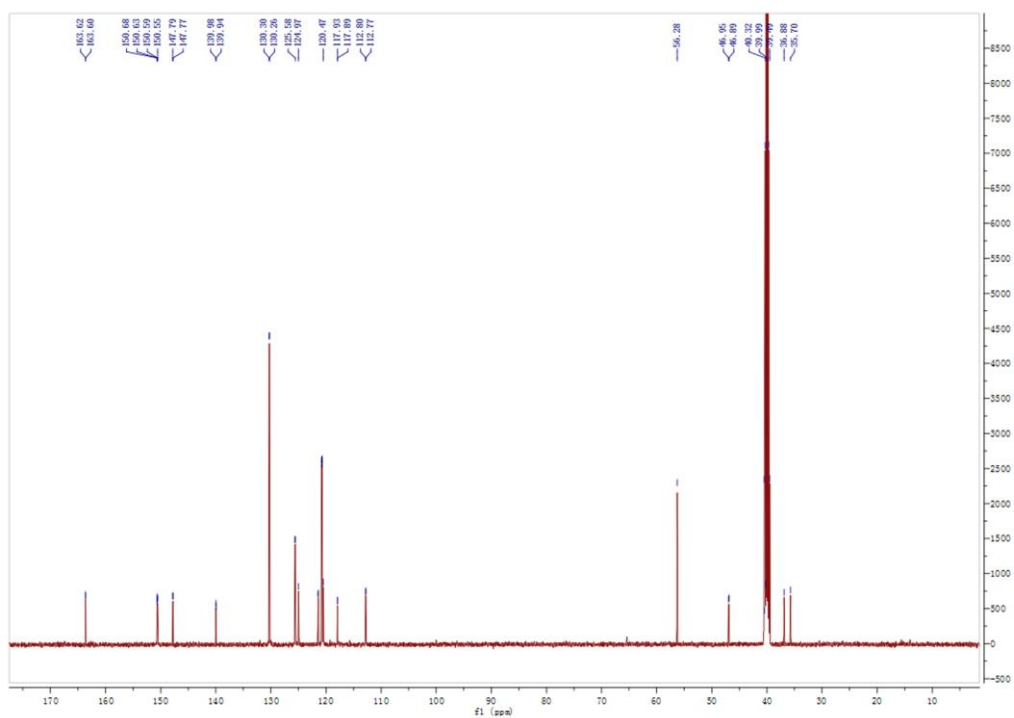

7c.diphenyl 2-amino-3-cyano-8-methoxy-4H-chromen-4-ylphosphonate

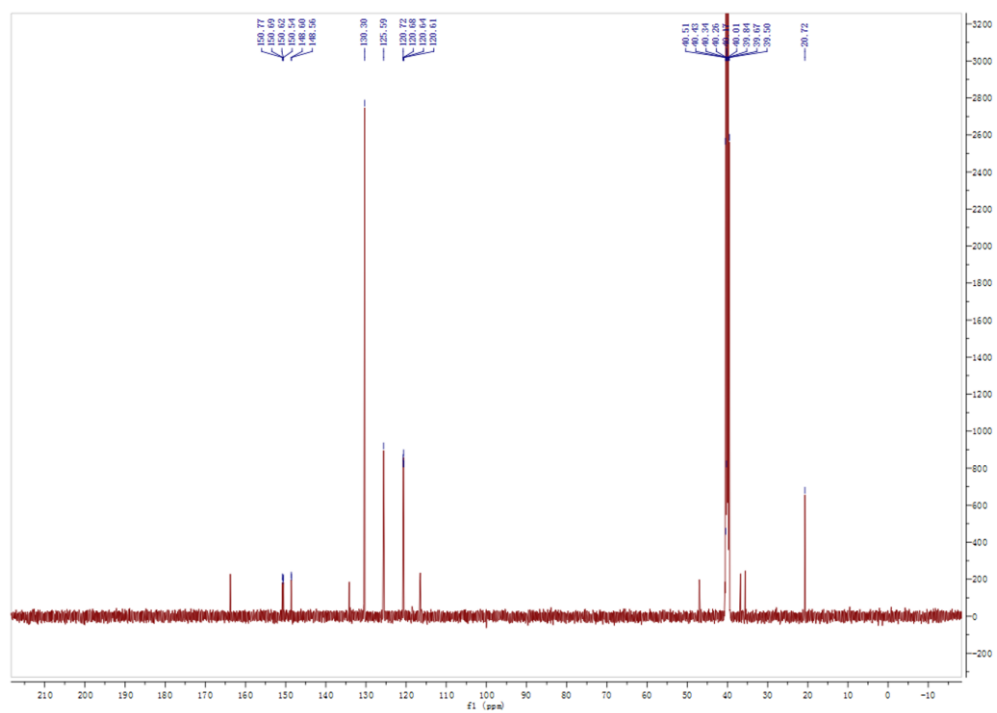

7d.diphenyl 2-amino-3-cyano-6-methyl-4H-chromen-4-ylphosphonate

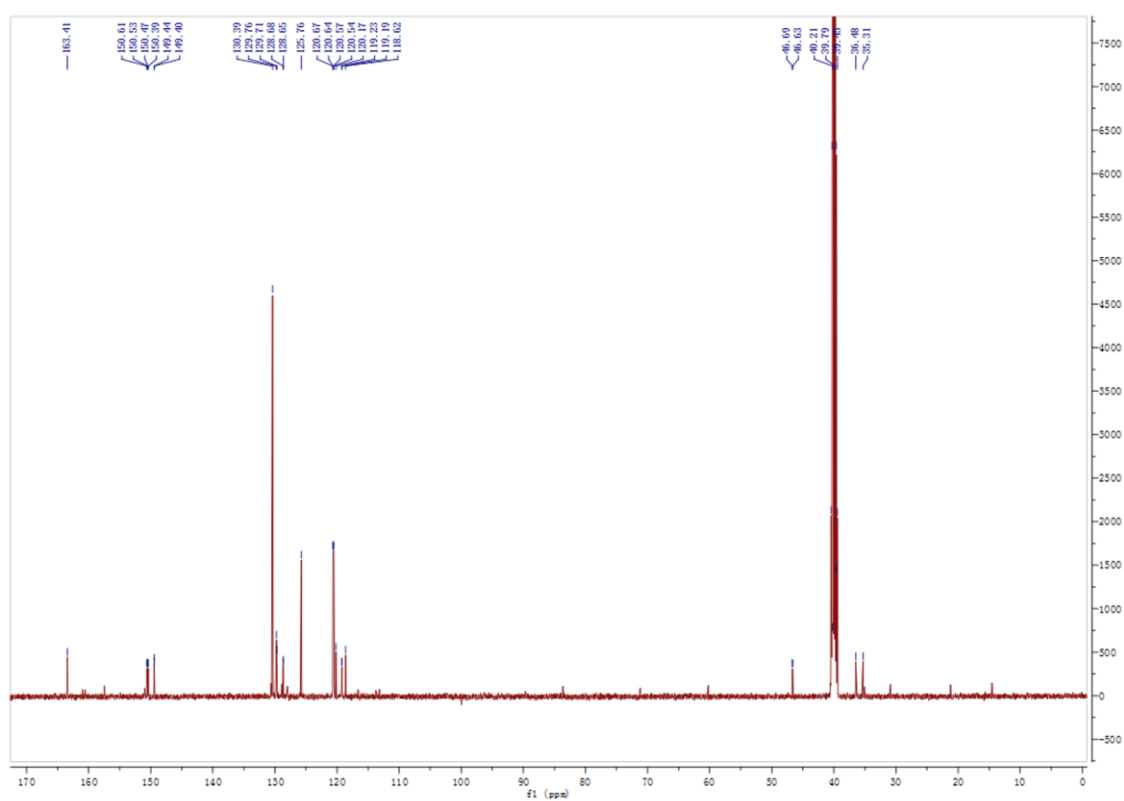

7e. diphenyl 2-amino-6-chloro-3-cyano-4H-chromen-4-ylphosphonate

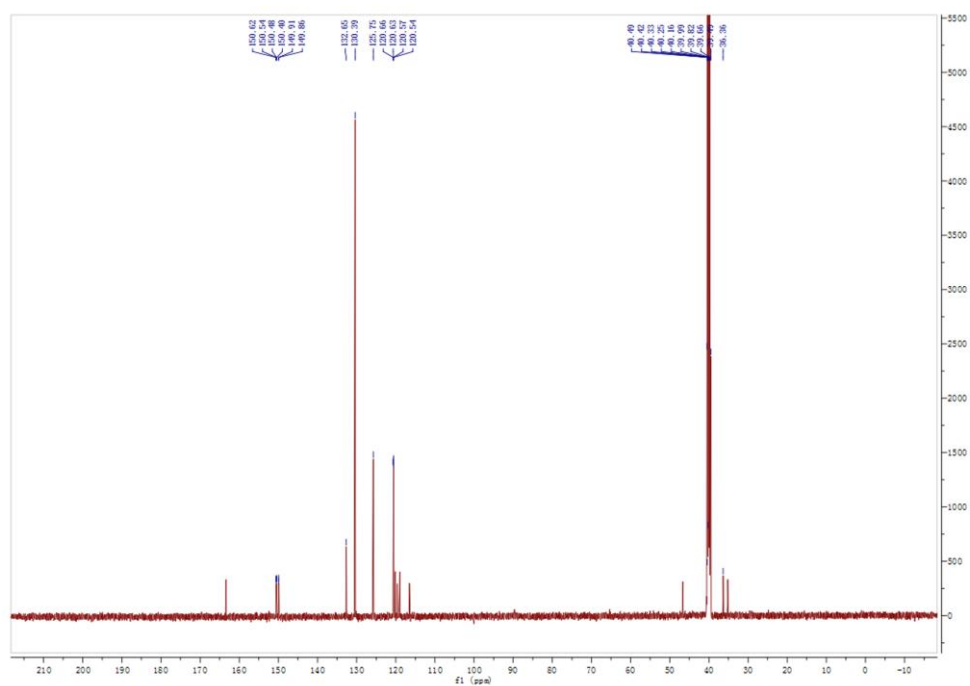

7f. diphenyl 2-amino-6-bromo-3-cyano-4H-chromen-4-ylphosphonate

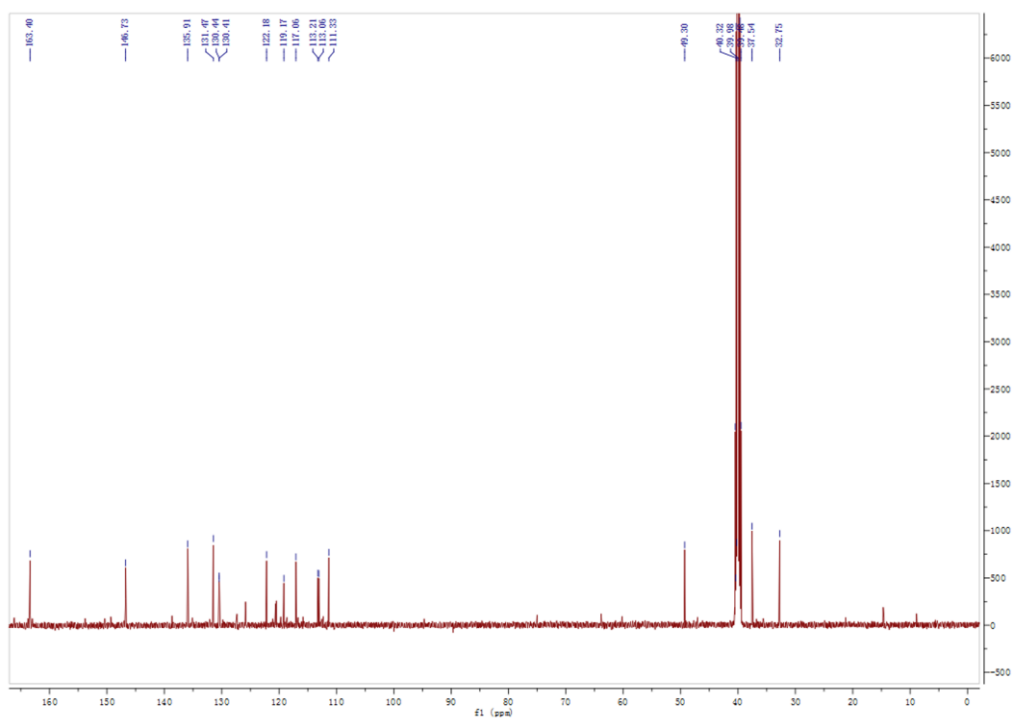

**7g, diphenyl 2-amino-6,8-dibromo-3-cyano-4H-chromen-4-ylphosphonate**

Copies of  $^{31}\text{P}$ -NMR Spectra for Compounds 7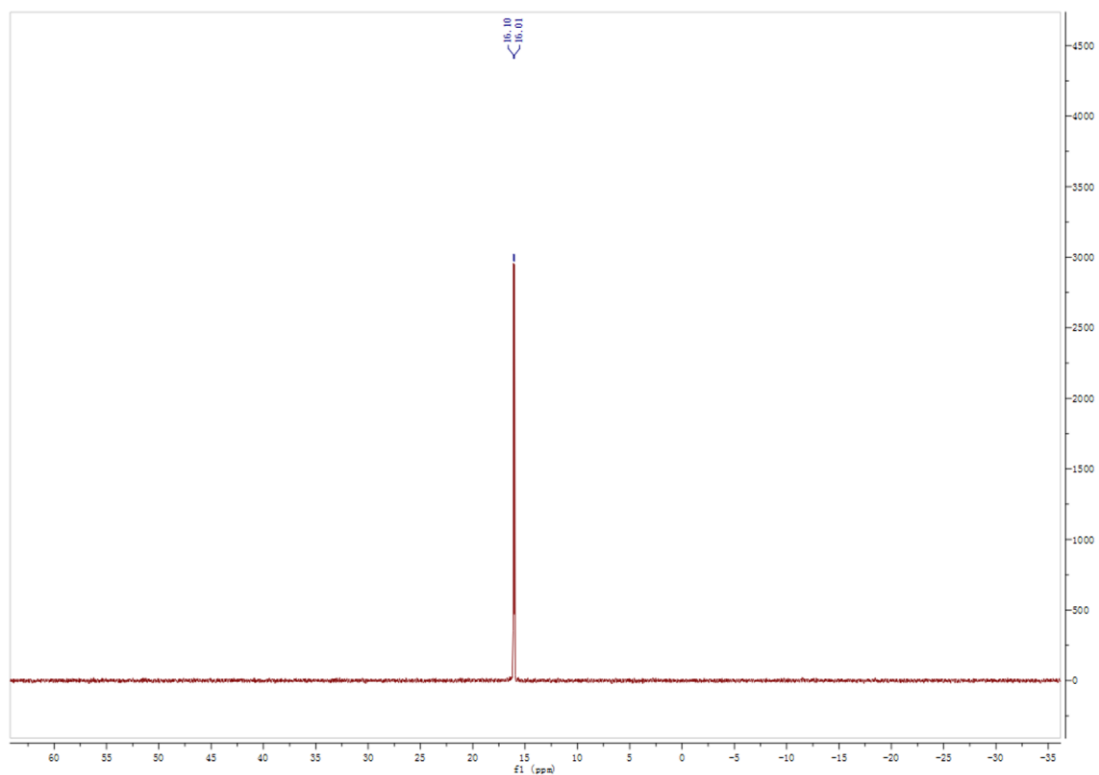**7a.diphenyl 2-amino-3-cyano-4H-chromen-4-ylphosphonate**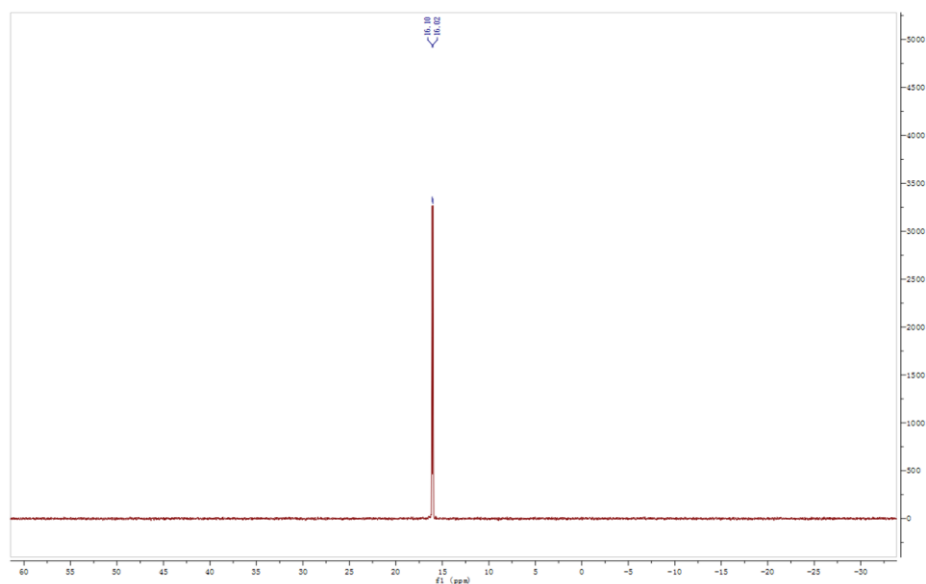**7b.diphenyl 2-amino-3-cyano-8-ethoxy-4H-chromen-4-ylphosphonate**

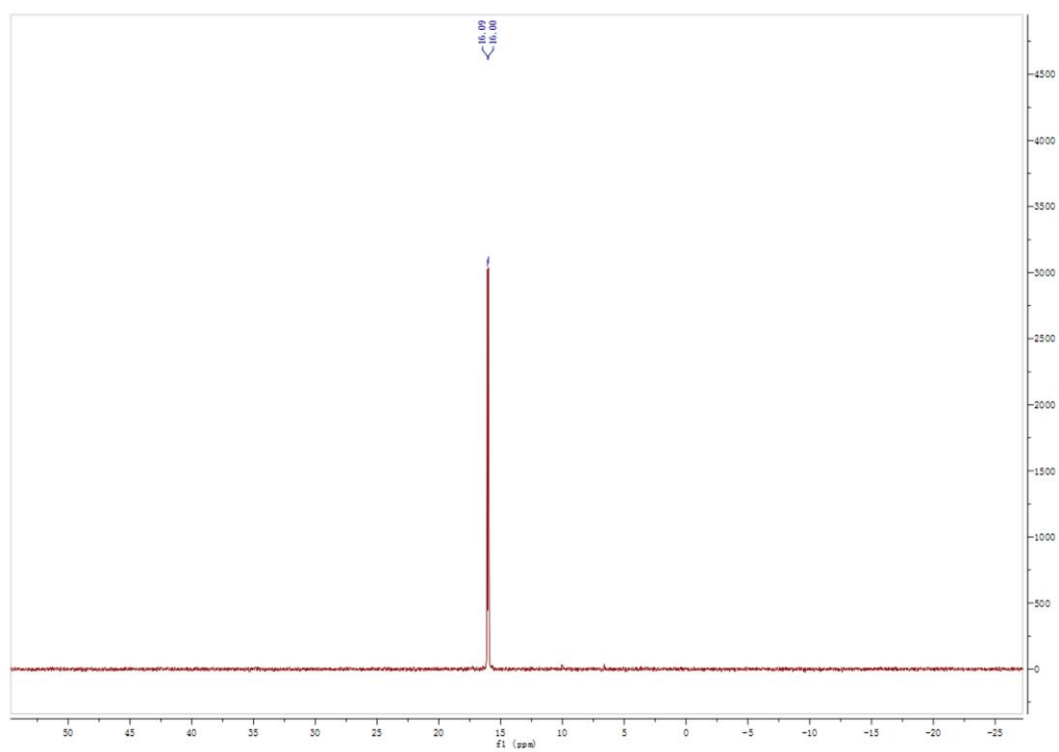

**7c.diphenyl 2-amino-3-cyano-8-methoxy-4H-chromen-4-ylphosphonate**

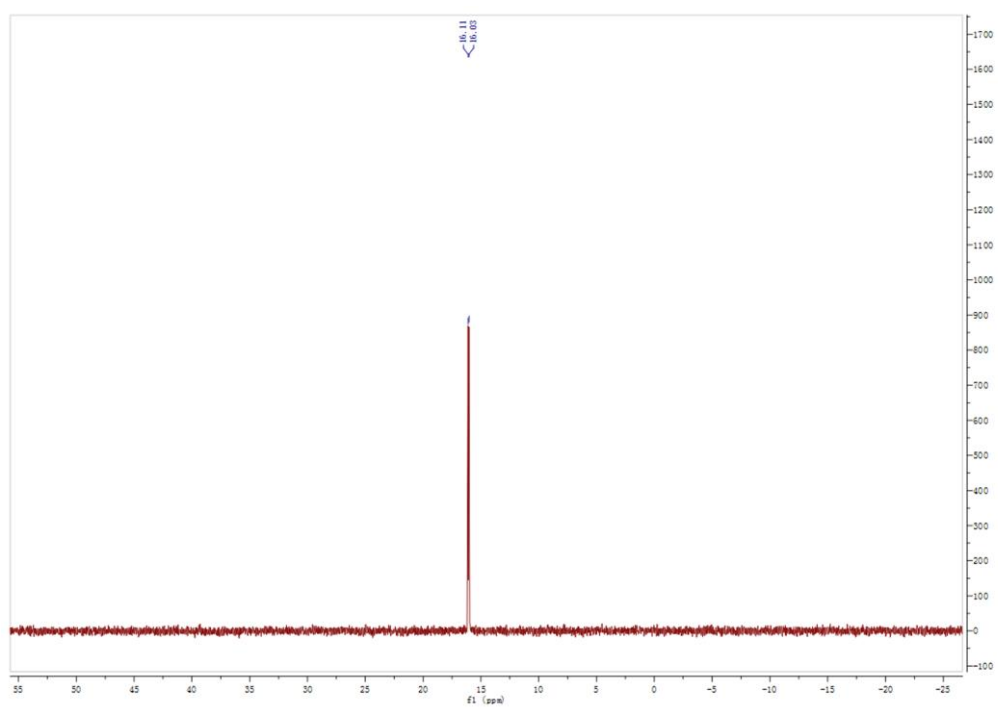

**7d.diphenyl 2-amino-3-cyano-6-methyl-4H-chromen-4-ylphosphonate**

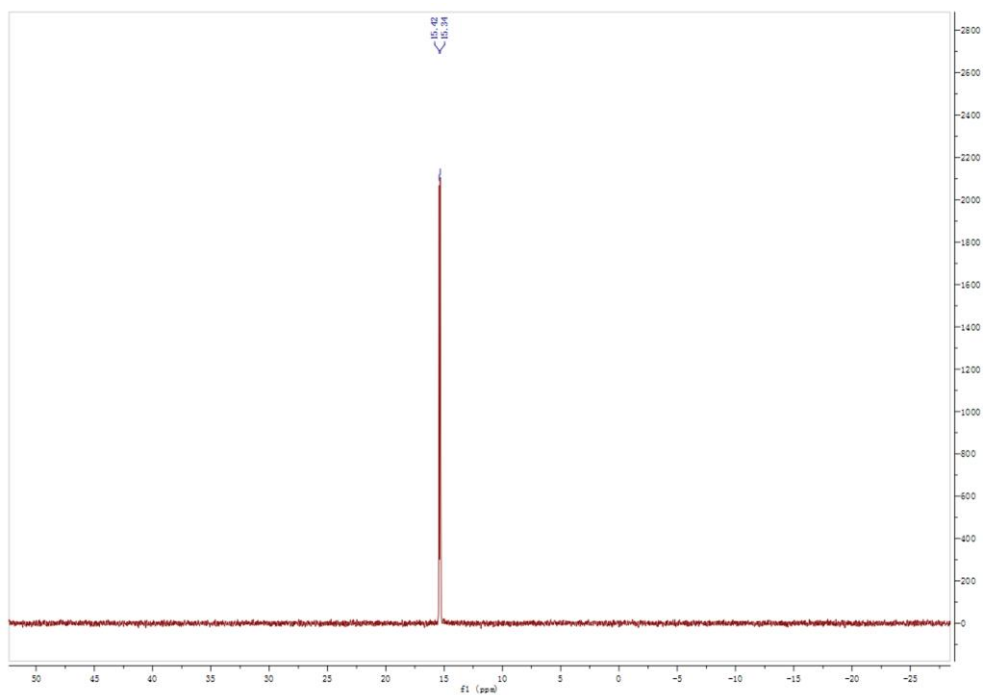

**7e.diphenyl 2-amino-6-chloro-3-cyano-4H-chromen-4-ylphosphonate**

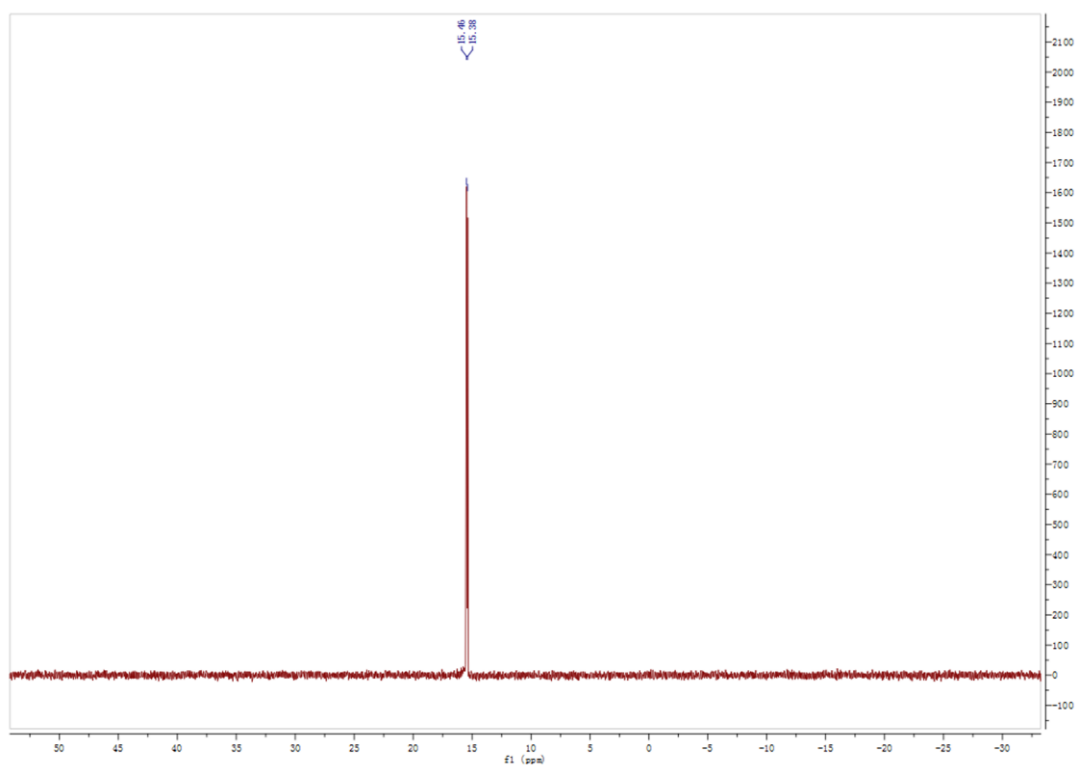

**7f.diphenyl 2-amino-6-bromo-3-cyano-4H-chromen-4-ylphosphonate**

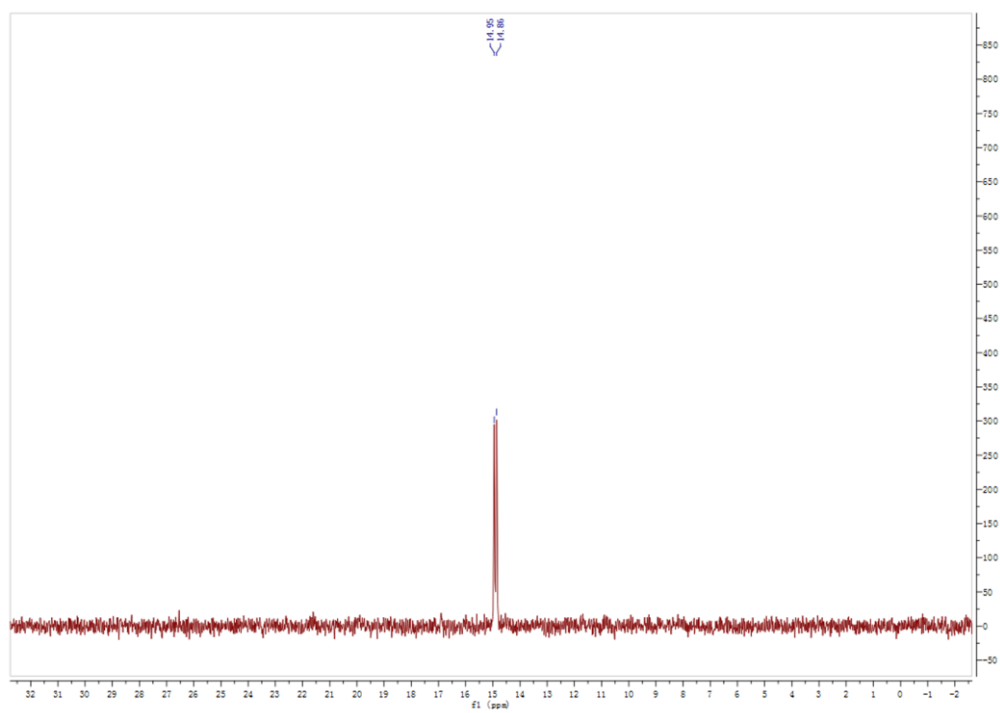

**7g.diphenyl 2-amino-6, 8-dibromo-3-cyano-4H-chromen-4-ylphosphonate**



## Copies of MS Spectra for Compounds 7

0519-9 140518103937 #71 RT: 0.52 AV: 1 NL: 3.39E4  
T: ITMS + cESI:slid=35.00 Fullms[50.00-1000.00]

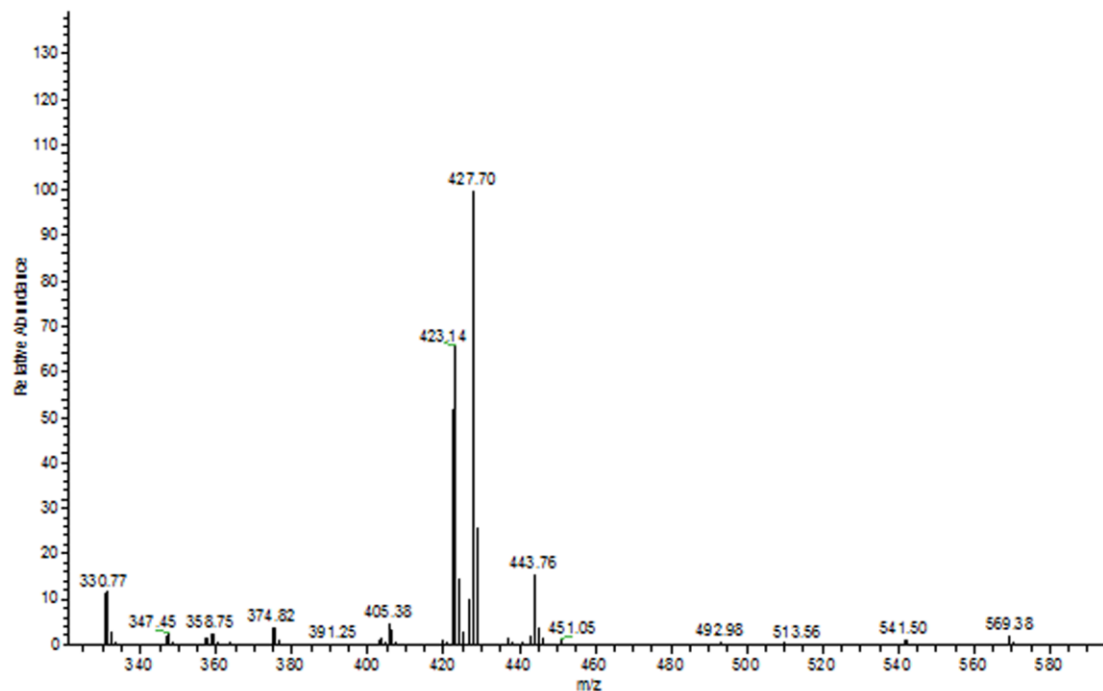

7a.diphenyl 2-amino-3-cyano-4H-chromen-4-ylphosphonate

0519-1C #4-7 RT: 0.02-0.04 AV: 4 NL: 4.03E4  
T: ITMS + cESI:Full ms [50.00-1000.00]

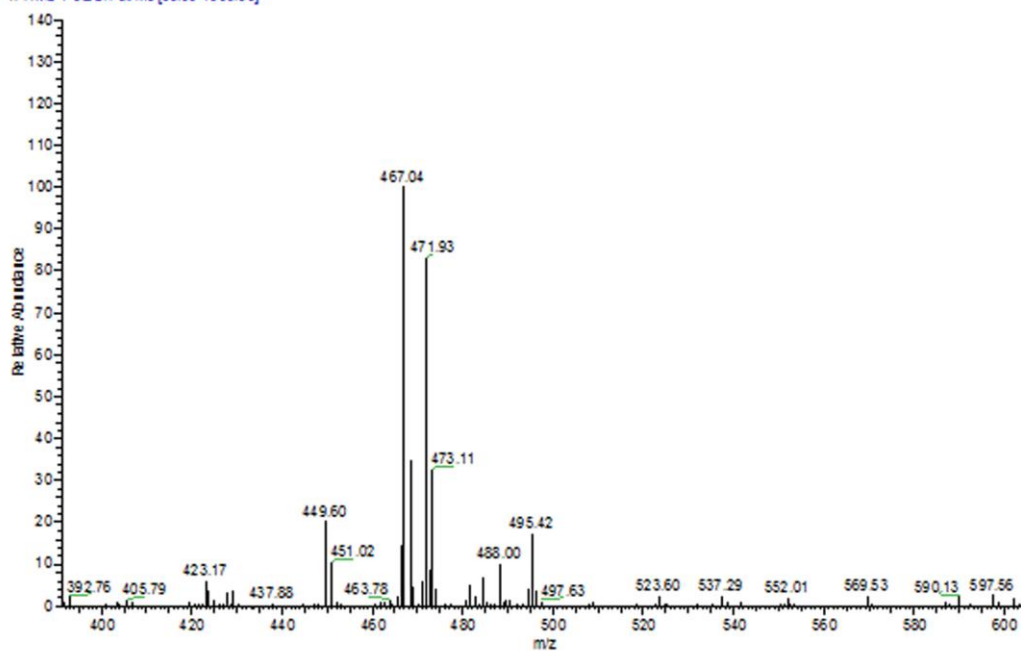

7b.diphenyl 2-amino-3-cyano-8-ethoxy-4H-chromen-4-ylphosphonate

0519-11 140518104834 #77 RT: 0.55 AV: 1 NL: 2.89E4  
T: ITMS + cESI Full ms [50.00-1000.00]

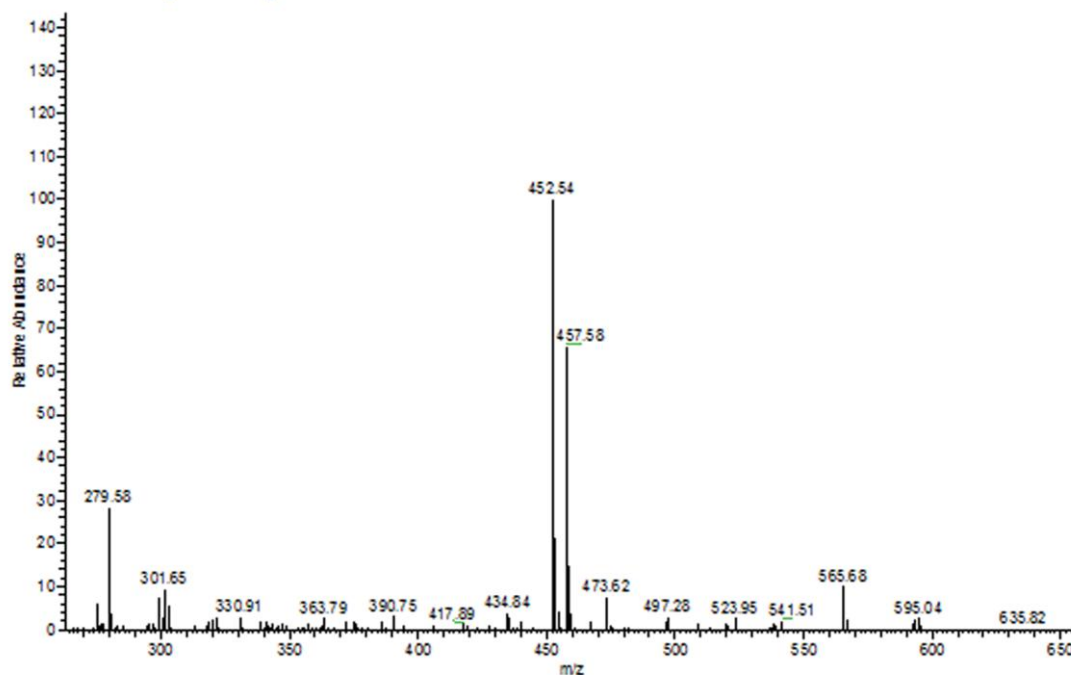

7c.diphenyl 2-amino-3-cyano-8-methoxy-4H-chromen-4-ylphosphonate

0519-12 140518105907 #20 RT: 0.14 AV: 1 NL: 4.54E4  
T: ITMS + cESI Full ms [50.00-1000.00]

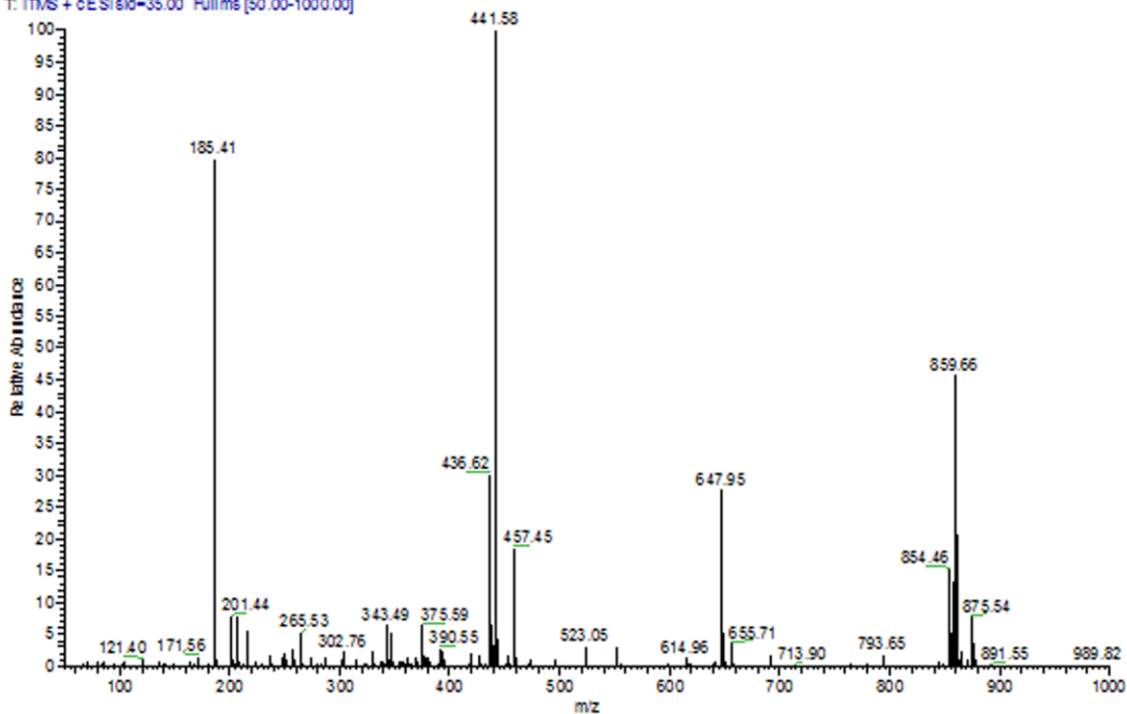

7d.diphenyl 2-amino-3-cyano-6-methyl-4H-chromen-4-ylphosphonate

0519-13 140518105907 #412 RT: 3.04 AV: 1 NL: 4.98E4  
T: ITMS + cESI:slid=35.00 Fullms[50.00-1000.00]

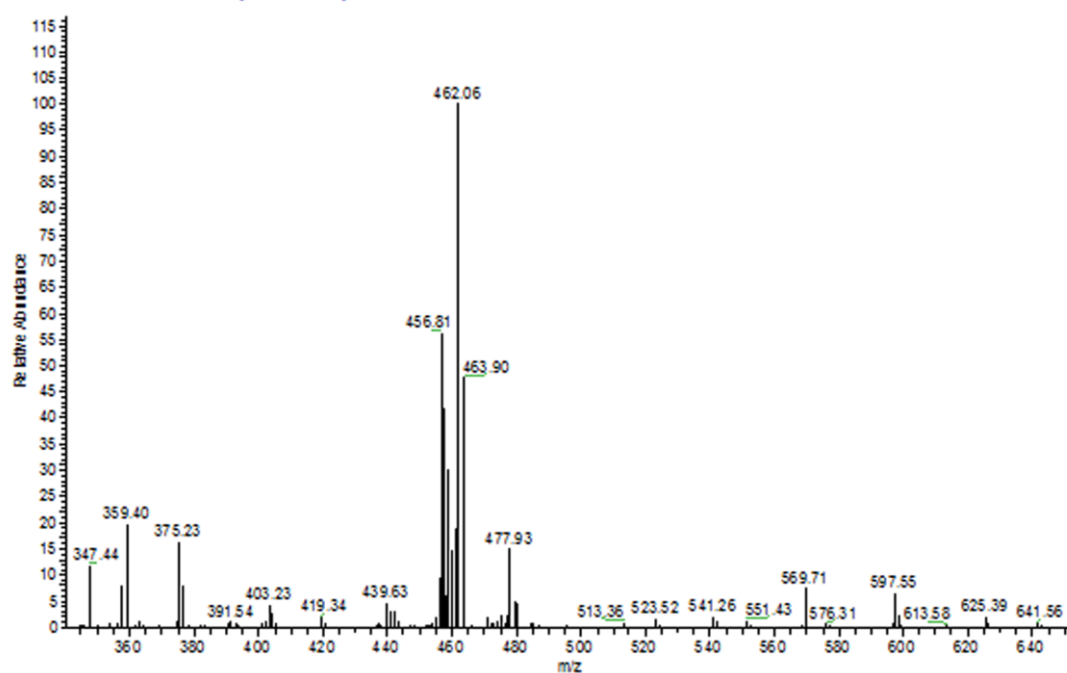

7e.diphenyl 2-amino-6-chloro-3-cyano-4H-chromen-4-ylphosphonate

0519-14 140518110505 #240 RT: 1.93 AV: 1 NL: 1.75E4  
T: ITMS + cESI:slid=35.00 Fullms [50.00-1200.00]

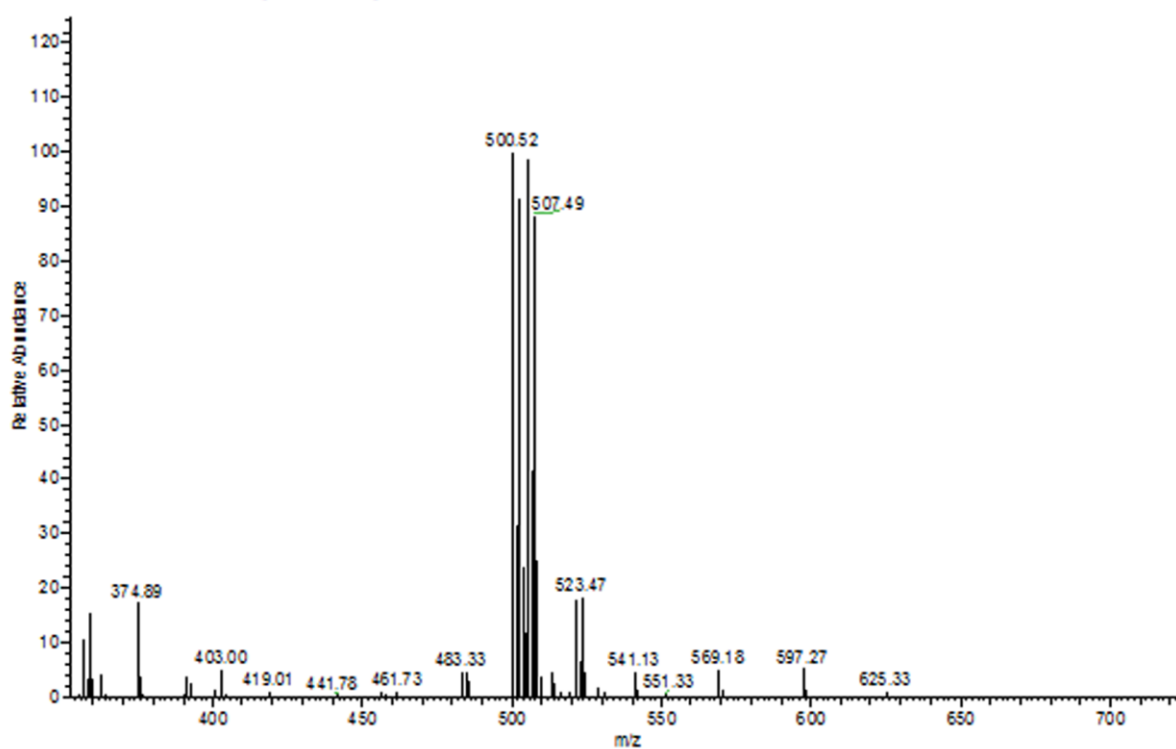

7f.diphenyl 2-amino-6-bromo-3-cyano-4H-chromen-4-ylphosphonate

05-19-15 140518111732 #201 RT: 1.76 AV: 1 NL: 1.98E4  
T: ITMS + cESI/sld=35.00 Fullms[50.00-1500.00]

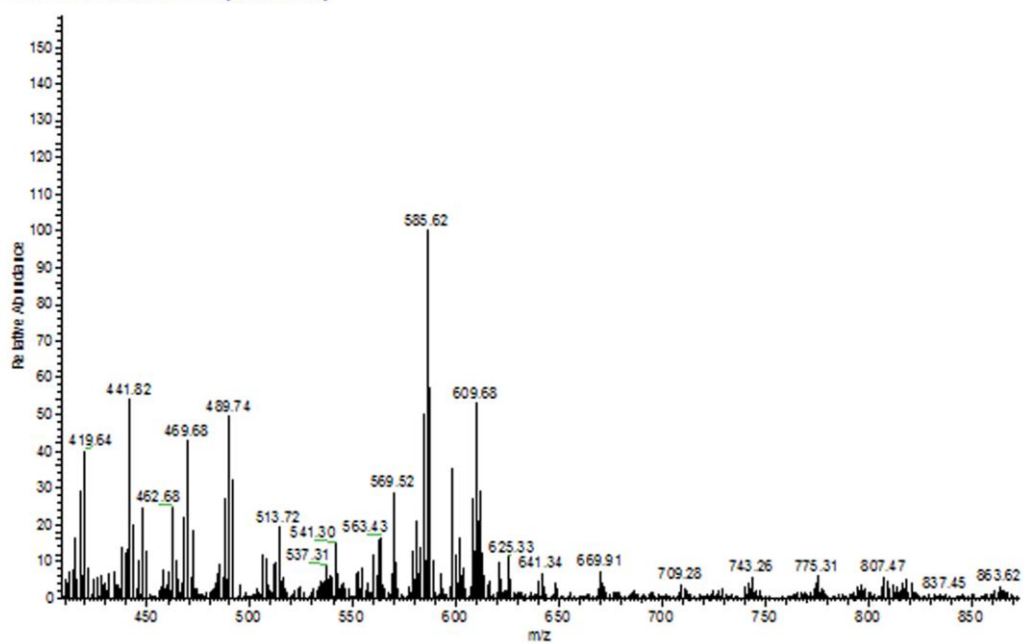

**7g.diphenyl 2-amino-6, 8-dibromo-3-cyano-4H-chromen-4-ylphosphonate**
